# Supplementary material for: Activation of the unfolded protein response in high glucose treated endothelial cells is mediated by methylglyoxal
Source: PubMed Central journal article supplement (PMC6536510; doi:10.1038/s41598-019-44358-1), 2019-05-27

## Supplementary information, tables and original gel images

### Activation of the unfolded protein response in high glucose treated endothelial cells is mediated by methylglyoxal

Zehra Irshad,<sup>1\*</sup> Mingzhan Xue,<sup>1\*</sup> Amal Ashour,<sup>1,2</sup> James R. Larkin,<sup>1,3</sup> Paul J. Thornalley<sup>1,4</sup> and Naila Rabbani<sup>1,5</sup>

**Materials** L-Lactic dehydrogenase from bovine heart, type III (Cat# L2625), D-lactic dehydrogenase from *Staphylococcus epidermidis* (Cat# L9636), L-lactate, sodium salt (Cat# 71718), D-lactate, sodium salt (Cat# 71716), 1,2-diaminobenzene, sublimed (Cat# 694975), *trans*-resveratrol (Cat# R5010), hesperetin (Cat# W431300), pepsin from porcine stomach mucosa (Cat# P6887), prolidase from porcine kidney (Cat# P6675), pronase E - type XIV from *Streptomyces griseus* (Cat# P5147), leucine aminopeptidase - type VI from porcine kidney (Cat# L6007), DL-dithiothreitol (Cat# 43819), iodoacetamide (Cat# I1149), trypsin, N-*p*-tosyl-L-phenylalanine chloromethyl ketone-treated (Cat# 4352157-1KT), endoproteinase Lys-C - sequencing grade from *Lysobacter enzymogenes* (Cat# 11047825001) and KiCqStart<sup>®</sup> SYBR<sup>®</sup> Green qPCR ReadyMix<sup>™</sup> real time quantitative PCR kit (Cat# KCQS01) were from Sigma-Aldrich (Poole, Dorset, U.K.). Radio-immunoprecipitation assay (RIPA) buffer (Cat# 9806) was from Cell Signaling Technology (Leiden, The Netherlands). Antibodies: hexokinase-2 antibody (Cat# ab131196), HSP70 antibody (Cat# ab194360), glucose-6-phosphate dehydrogenase antibody (Cat# ab124738) and  $\beta$ -actin antibody (Cat# ab8229) were from Abcam (Cambridge, U.K.); rabbit IgG antibody (Cat# A9169) was from Sigma-Aldrich; and GRP 78 antibody - A-10 (Cat# sc-376768) was from Santa Cruz Biotechnology (Heidelberg, Germany). Commercial assay kits: glucose assay - hexokinase method (Cat# GAHK2) was from Sigma-Aldrich; glycogen assay kit II- colorimetric (Cat#

ab169558) was from Abcam; ubiquitination protein enrichment kit (Cat# 662200) was from Merck Ltd (Watford, U.K.); interleukin-8 immunoassay kit - Quantikine® ELISA (Cat# D8000C) was from R & D Systems (Abingdon, U.K.); and DC protein assay kit II (Cat# 5000112) was from Bio-Rad (Watford, U.K.).

## **Supplementary methods**

**Proteomics and bioinformatics analysis** Cytosolic protein extracts were prepared from HAECs incubated for 6 days with 5 mM and 20 mM D-glucose and cytosolic protein extract of HMEC-1 cells that had been incubated with 500  $\mu$ M MG for 24 h at 37 °C increasing the MG-H1 residue content by 10-fold to 5.0 mmol/mol arg. Cell pellets were suspended in aliquots of 10 mM sodium phosphate buffer, pH 7.0 (400  $\mu$ l) and sonicated on ice (100 W, 30 s). Samples were centrifuged (20,000 g, 30 min, 4°C) to sediment membranes. The supernatant was transferred and stored at -80°C until analysis. Lysate (500  $\mu$ g) was washed by 4 cycles of concentration to 40  $\mu$ l and dilution to 400  $\mu$ l with water over microspin ultrafilter (10 kDa cut-off) at 4°C. The final washed protein concentration was determined by Bradford method. An aliquot of cytosolic protein extract (100  $\mu$ g, 50  $\mu$ l) was treated with dithiothreitol (6  $\mu$ l, 6 mM) and incubated at 37°C in the dark for 30 min; and then treated with iodoacetamide (5.9  $\mu$ l, 10.8 mM) and incubated at 37°C in the dark for 30 min. Residual iodoacetamide was then quenched by further addition of dithiothreitol (5.9  $\mu$ l 6 mM) and incubated at 37°C in the dark for 30 min. An aliquot of Lys-C protease (1 mg/ml, 5  $\mu$ l) in 500 mM ammonium bicarbonate, pH 8.0, was added and incubated for 1 h at 37°C. Then TPCK-treated trypsin (1 mg/ml, 5  $\mu$ l) in 1 mM calcium chloride/500 mM ammonium bicarbonate, pH 8.0, was added and samples were incubated at 37°C for 5 h in the dark. Finally, the reaction was stopped by adding 10% TFA (5  $\mu$ l) in water. The sample was lyophilised to

dryness to remove volatile salts and re-suspend in an aliquot (100µl) 0.1% formic acid in water and analysed by nanoflow liquid-chromatography-Orbitrap mass spectrometry.

The processed cell lysate samples were submitted to the Mass Spectrometry and Proteomics Facility at Warwick University for a label-free proteomic quantitation analysis. Reversed phase nanoflow liquid chromatography-mass spectrometry for global protein identification was performed on an Orbitrap mass spectrometer (Fusion<sup>TM</sup> Tribrid<sup>TM</sup>, ThermoFisher Scientific) equipped with a microspray source operating in positive ion mode. For proteomics analysis the column used was: an Acclaim PepMap µ-pre-column cartridge (trap), 300 µm i.d. x 5 mm, 5 µm particle size, 100 Å pore size, fitted to an Acclaim PepMap RSLC 75 µm i.d. x 50 cm, 2 µm particle size, 100 Å pore size main column (ThermoFisher Scientific). It was installed on an Ultimate 3000 RSLCnano system (Dionex). An aliquot (5 µl) of sample was injected. After injection, the peptides were eluted off of the trap onto the analytical column. Mobile phases were: A - 0.1% formic acid in water, and B - 0.1% formic acid in acetonitrile. The flow rate was programmed at 0.3 % to 35% 220 min. Mobile phase B was then increased from 35% to 80% in 5 min before being brought back quickly to 3% in 1 min. The column was equilibrated at 3% of mobile phase B for 15 min before the next sample. Peptides were eluted directly (300 nl min<sup>-1</sup>) via a Triversa Nanomate nanospray source (Advion Biosciences, NY) into the Orbitrap mass spectrometer. Survey scans of peptide precursors from 350 to 1500 *m/z* were performed at 120K resolution (at 200 *m/z*) with automatic gain control (AGC)  $4 \times 10^5$ . Precursor ions with charge state 2 - 7 were isolated in 1.6 Th intervals in the quadrupole and subjected to high energy collision dissociation fragmentation programmed to 35% and fragments ions detected by rapid scan MS analysis in the ion trap; the AGC was set to  $1 \times 10^4$  and the max injection time was 200 ms. Dynamic exclusion duration was set to 45 s with a 10 ppm tolerance around the selected precursor and its isotopes. Monoisotopic precursor selection was turned on. The instrument was run in top

speed mode with 2 s cycles. Sequence information from the MS/MS data was managed using MSConvert in ProteoWizard Toolkit (version 3.0.5759) <sup>1</sup> and searched with Mascot engine (Matrix Science, version 2.5.0) against *Homo sapiens* protein sequence database (<http://www.uniprot.org/>) assuming enzyme tryptic digestion to determine levels of false-positive peptide identifications; spectra were also searched against the corresponding reverse database, the common Repository of Adventitious Proteins Database (<http://www.thegpm.org/cRAP/index.html>). Search parameters for Precursor mass and product ions tolerance were, respectively,  $\pm 5$  ppm and  $\pm 0.8$  Da, with allowance made for two missed trypsin cleavages, fixed modification of cysteine through carbamidomethylation and methionine oxidation. Only fully tryptic peptide matches were allowed. Scaffold (version Scaffold 4.3.2, Proteome Software Inc.) was used to validate MS/MS based peptide and protein identifications from MS/MS sequencing results. Peptide identifications were accepted if they could be established at greater than 95.0% probability by the Scaffold Local FDR algorithm and contained at least 2 identified unique peptides; probabilities assigned by the Protein Prophet algorithm <sup>2</sup>. A relative quantification of protein concentration was performed using unique peptides in Progenesis see <http://www.nonlinear.com/progenesis/qi-for-proteomics/v2.0/faq/which-quantitation-method-should-i-choose-for-my-experiment.aspx#relative-all> for further details).

Protein ontology was evaluated using the Database for Annotation, Visualization and Integrated Discovery (DAVID) v6.8 (<https://david.ncifcrf.gov/>) <sup>3</sup> to identify molecular functions and biologic processes that may be impacted by changes in protein abundance and MG modification. REACTOME database was used (<https://reactome.org/>) for pathways analysis and INTERPRO analysis was performed (<https://www.ebi.ac.uk/interpro/>) for enrichment of protein domains modified by MG. Pathway and domain enrichment was

considered significant with Bonferroni significant and false positive discovery rate (FDR) of <0.05.

RBD analysis was performed using peptide window width of 5 residues and alpha-helix angle 100°, as found optimum by Gallet *at al.* <sup>4</sup>. It was applied to the 220 proteins detected with MG modification in the cytosolic protein extract of HMEC-1 cells (Table 4). Protein sequences were obtained from the UniProtKB/Swiss-Prot database. Non-standard amino acid codes in sequences were treated as follows: U (selenocysteine) as cysteine; B (asparagine or aspartic acid) as asparagine; Z (glutamine or glutamic acid) as glutamic acid; J (leucine or isoleucine) as leucine; and X (unknown or unspecified) as glycine. For each amino acid, mean alpha-helical hydrophobic moment ( $\mu_H$ ) and mean hydrophobicity (H) were calculated and plotted. The RBD area was defined as the trapezium bounded by  $H < 0.5$ ,  $\mu_H > 0.25$  and the equation  $\mu_H = -0.4H + 0.6$ . Arginine and MG-H1 residues which lay within the RBD were identified.

## References

- 1 Kessner, D., Chambers, M., Burke, R., Agus, D. & Mallick, P. ProteoWizard: open source software for rapid proteomics tools development. *Bioinformatics* **24**, 2534-2536 (2008).
- 2 Nesvizhskii, A. I., Keller, A., Kolker, E. & Aebersold, R. A Statistical Model for Identifying Proteins by Tandem Mass Spectrometry. *Anal. Chem.* **75**, 4646-4658 (2003).
- 3 Huang, D. W., Sherman, B. T. & Lempicki, R. A. Systematic and integrative analysis of large gene lists using DAVID bioinformatics resources. *Nature Protocols* **4**, 44 (2008).
- 4 Gallet, X., Charlotiaux, B., Thomas, A. & Brasseur, R. A fast method to predict protein interaction sites from sequences. *J Mol Biol* **302**, 917-926 (2000).

Table S1. 231 Proteins increased in high glucose culture.

| No | Protein (gene)                                                                   | Fold increase | UNIPROT ID  |
|----|----------------------------------------------------------------------------------|---------------|-------------|
| 1  | Leukotriene A4 hydrolase (LTA4H)                                                 | 3.54          | LKHA4_HUMAN |
| 2  | Gamma-glutamylcyclotransferase (GGCT)                                            | 3.23          | GGCT_HUMAN  |
| 3  | 5-Methyltetrahydrofolate-homocysteine methyltransferase (MTR)                    | 3.16          | METH_HUMAN  |
| 4  | Glutamic-oxaloacetic transaminase 1 (GOT1)                                       | 2.93          | AATC_HUMAN  |
| 5  | G patch domain and KOW motifs-containing protein (GPKOW)                         | 2.61          | GPKOW_HUMAN |
| 6  | Thioredoxin reductase 1 (TXNRD1)                                                 | 2.43          | TRXR1_HUMAN |
| 7  | Actinin alpha 1 (ACTN1)                                                          | 2.31          | ACTN1_HUMAN |
| 8  | Glyceraldehyde-3-phosphate dehydrogenase (GAPDH)                                 | 2.23          | G3P_HUMAN   |
| 9  | Serpin family E member 1 (SERPINE1)                                              | 2.18          | PAI1_HUMAN  |
| 10 | SH3 domain-binding glutamic acid-rich-like protein (SH3BGRL)                     | 2.11          | SH3L1_HUMAN |
| 11 | Protein O-GlcNAcase (MGEA5)                                                      | 2.09          | OGA_HUMAN   |
| 12 | Septin 10 (SEPT10)                                                               | 2.09          | SEP10_HUMAN |
| 13 | Transgelin (TAGLN)                                                               | 2.07          | TAGL_HUMAN  |
| 14 | Myosin light chain 12A (MYL12A)                                                  | 2.06          | ML12A_HUMAN |
| 15 | Phosphatidylinositol transfer protein alpha (PITPNA)                             | 2.05          | PIPNA_HUMAN |
| 16 | Intersectin 1 (ITSN1)                                                            | 1.99          | ITSN1_HUMAN |
| 17 | Iron-responsive element-binding protein 2 (IREB2)                                | 1.97          | IREB2_HUMAN |
| 18 | Heme-binding protein 1 (HEBP1)                                                   | 1.97          | HEBP1_HUMAN |
| 19 | COP9 signalosome subunit 3 (COPS3)                                               | 1.88          | CSN3_HUMAN  |
| 20 | Signal peptidase complex subunit 2 (SPCS2)                                       | 1.87          | SPCS2_HUMAN |
| 21 | CCR4-NOT transcription complex subunit 3 (CNOT3)                                 | 1.86          | CNOT3_HUMAN |
| 22 | Nuclear migration protein (NUDC)                                                 | 1.86          | NUDC_HUMAN  |
| 23 | Branched chain amino acid transaminase 1 (BCAT1)                                 | 1.86          | BCAT1_HUMAN |
| 24 | Twinfilin-2 (TWF2)                                                               | 1.83          | TWF2_HUMAN  |
| 25 | N-Acetylglucosamine kinase (NAGK)                                                | 1.80          | NAGK_HUMAN  |
| 26 | Calponin 3 (CNN3)                                                                | 1.80          | CNN3_HUMAN  |
| 27 | Cingulin like 1 (CGNL1)                                                          | 1.78          | CGNL1_HUMAN |
| 28 | Phosphoglycerate kinase 1 (PGK1)                                                 | 1.78          | PGK1_HUMAN  |
| 29 | N-Myristoyltransferase 1 (NMT1)                                                  | 1.76          | NMT1_HUMAN  |
| 30 | Minichromosome maintenance complex binding protein (MCMBP)                       | 1.76          | MCMBP_HUMAN |
| 31 | Negative regulator of ubiquitin like proteins 1 (NUB1)                           | 1.74          | NUB1_HUMAN  |
| 32 | Methionine aminopeptidase 1 (METAP1)                                             | 1.71          | MAP11_HUMAN |
| 33 | AP-3 complex subunit mu-1 (AP3M1)                                                | 1.70          | AP3M1_HUMAN |
| 34 | A-kinase anchoring protein 13 (AKAP13)                                           | 1.70          | AKP13_HUMAN |
| 35 | Cell division cycle 2, G1 to S and G2 to M, isoform CRA_a (CDC2)                 | 1.69          | CDK1_HUMAN  |
| 36 | G-rich RNA sequence binding factor 1 (GRSF1)                                     | 1.68          | GRSF1_HUMAN |
| 37 | Proteasome 26S subunit, non-ATPase 13 (PSMD13)                                   | 1.67          | PSD13_HUMAN |
| 38 | Fructosamine 3 kinase related protein (FN3KRP)                                   | 1.67          | KT3K_HUMAN  |
| 39 | Leucine-rich repeat flightless-interacting protein 1 (LRRFIP1)                   | 1.67          | LRRF1_HUMAN |
| 40 | Phosphatidylethanolamine-binding protein 1 (PEBP1)                               | 1.67          | PEBP1_HUMAN |
| 41 | EH domain containing 1 (EHD1)                                                    | 1.67          | EHD1_HUMAN  |
| 42 | Parvin beta (PARVB)                                                              | 1.66          | PARVB_HUMAN |
| 43 | Activator of Hsp90 ATPase activity 1 (AHSA1)                                     | 1.66          | AHSA1_HUMAN |
| 44 | Immunity-related GTPase family Q protein (IRGQ)                                  | 1.65          | IRGQ_HUMAN  |
| 45 | Serine/threonine-protein phosphatase 2A catalytic subunit alpha isoform (PPP2CA) | 1.65          | PP2AA_HUMAN |
| 46 | Fructose-bisphosphate aldolase C (ALDOC)                                         | 1.64          | ALDOC_HUMAN |
| 47 | Glucosamine-6-phosphate deaminase 1 (GNPDA1)                                     | 1.64          | GNP1_HUMAN  |
| 48 | Activating signal cointegrator 1 complex subunit 3 (ASCC3)                       | 1.64          | ASCC3_HUMAN |
| 49 | Set1/Ash2 histone methyltransferase complex subunit ASH2 (ASH2L)                 | 1.63          | ASH2L_HUMAN |
| 50 | Stress-70 protein, mitochondrial (HSPA9)                                         | 1.62          | GRP75_HUMAN |
| 51 | Glutamate-cysteine ligase catalytic subunit (GCLC)                               | 1.62          | GSH1_HUMAN  |
| 52 | Synaptopodin (SYNPO)                                                             | 1.62          | SYNPO_HUMAN |
| 53 | COP9 signalosome subunit 8 (COPS8)                                               | 1.62          | CSN8_HUMAN  |
| 54 | Tetratricopeptide repeat protein 1 (TTC1)                                        | 1.61          | TTC1_HUMAN  |
| 55 | Parvin alpha (PARVA)                                                             | 1.61          | PARVA_HUMAN |
| 56 | Importin 4 (IPO4)                                                                | 1.60          | IPO4_HUMAN  |
| 57 | Splicing factor U2AF 65 kDa subunit (U2AF2)                                      | 1.60          | U2AF2_HUMAN |
| 58 | Ubiquitin conjugating enzyme E2 V2 (UBE2V2)                                      | 1.60          | UB2V2_HUMAN |
| 59 | Alcohol dehydrogenase [NADP(+)] (AKR1A1)                                         | 1.60          | AK1A1_HUMAN |
| 60 | 40S ribosomal protein S26 (RPS26)                                                | 1.60          | RS26_HUMAN  |
| 61 | Hedgehog interacting protein (HHIP)                                              | 1.59          | HHIP_HUMAN  |
| 62 | Cullin-5 (CUL5)                                                                  | 1.58          | CUL5_HUMAN  |
| 63 | Serine/arginine repetitive matrix 2 (SRRM2)                                      | 1.58          | SRRM2_HUMAN |

|                                                                                    |      |             |
|------------------------------------------------------------------------------------|------|-------------|
| 64 26S proteasome non-ATPase regulatory subunit 2 (PSMD2)                          | 1.58 | PSMD2_HUMAN |
| 65 F-actin-capping protein subunit alpha-2 (CAPZA2)                                | 1.58 | CAZA2_HUMAN |
| 66 Phosphoglucomutase 3 (PGM3)                                                     | 1.58 | AGM1_HUMAN  |
| 67 Elongation factor 1-beta (EEF1B2)                                               | 1.57 | EF1B_HUMAN  |
| 68 Phosphoribosyl pyrophosphate synthetase 1 (PRPS1)                               | 1.57 | PRPS1_HUMAN |
| 69 Serine/threonine-protein phosphatase 2A catalytic subunit beta isoform (PPP2CB) | 1.57 | PP2AB_HUMAN |
| 70 Malate dehydrogenase 2 (MDH2)                                                   | 1.56 | MDHM_HUMAN  |
| 71 Peptidylprolyl isomerase H (PIIH)                                               | 1.56 | PIIH_HUMAN  |
| 72 Glyoxalase domain containing 4 (GLOD4)                                          | 1.56 | GLOD4_HUMAN |
| 73 S-Methylthioadenosine phosphorylase (MTAP)                                      | 1.56 | MTAP_HUMAN  |
| 74 Eukaryotic peptide chain release factor subunit 1 (ETF1)                        | 1.55 | ERF1_HUMAN  |
| 75 Glyoxylate reductase/hydroxypyruvate reductase (GRHPR)                          | 1.55 | GRHPR_HUMAN |
| 76 Cleavage and polyadenylation specific factor 6 (CPSF6)                          | 1.54 | CPSF6_HUMAN |
| 77 Tyrosine-protein phosphatase non-receptor type 23 (PTPN23)                      | 1.54 | PTN23_HUMAN |
| 78 Prosaposin (PSAP)                                                               | 1.54 | SAP_HUMAN   |
| 79 Triosephosphate isomerase 1 (TPI1)                                              | 1.53 | TPIS_HUMAN  |
| 80 Procollagen-lysine,2-oxoglutarate 5-dioxygenase 1(PLOD1)                        | 1.52 | PLOD1_HUMAN |
| 81 N6-adenosine-methyltransferase 70 kDa subunit (METTL3)                          | 1.52 | MTA70_HUMAN |
| 82 Protein phosphatase 6 regulatory subunit 3 (PPP6R3)                             | 1.51 | PP6R3_HUMAN |
| 83 Ubiquitin specific peptidase 4 (USP4)                                           | 1.51 | UBP4_HUMAN  |
| 84 Reticulocalbin 2 (RCN2)                                                         | 1.51 | RCN2_HUMAN  |
| 85 Thioredoxin-like protein 1 (TXNL1)                                              | 1.51 | TXNL1_HUMAN |
| 86 Epsin-1 (EPN1)                                                                  | 1.51 | EPN1_HUMAN  |
| 87 Filamin B (FLNB)                                                                | 1.50 | FLNB_HUMAN  |
| 88 Prolyl 4-hydroxylase subunit alpha 2 (P4HA2)                                    | 1.50 | P4HA2_HUMAN |
| 89 Uncharacterized protein                                                         | 1.50 | A0A096LPI6  |
| 90 Carboxymethylenebutenolidase homolog (CMBL)                                     | 1.50 | CMBL_HUMAN  |
| 91 Interferon-induced guanylate-binding protein 1 (GBP1)                           | 1.50 | GBP1_HUMAN  |
| 92 Translationally-controlled tumor protein1 (TPT1)                                | 1.50 | TCTP_HUMAN  |
| 93 Exportin 4 (XPO4)                                                               | 1.49 | XPO4_HUMAN  |
| 94 Pyruvate kinase, muscle (PKM)                                                   | 1.49 | KPYM_HUMAN  |
| 95 Ribosomal protein S24 (RPS24)                                                   | 1.48 | RS24_HUMAN  |
| 96 COP9 signalosome complex subunit 6 (COPS6)                                      | 1.48 | CSN6_HUMAN  |
| 97 E2/E3 hybrid ubiquitin-protein ligase UBE2O (UBE2O)                             | 1.47 | UBE2O_HUMAN |
| 98 Zinc finger CCHC domain-containing protein 8 (ZcchC8)                           | 1.47 | ZCHC8_HUMAN |
| 99 Spectrin alpha, non-erythrocytic 1 (SPTAN1)                                     | 1.47 | SPTN1_HUMAN |
| 100 Tumor susceptibility 101 (TSG101)                                              | 1.46 | TS101_HUMAN |
| 101 Ornithine aminotransferase (OAT)                                               | 1.46 | OAT_HUMAN   |
| 102 Thrombospondin 1 (THBS1)                                                       | 1.46 | TSP1_HUMAN  |
| 103 Cartilage associated protein (CRTAP)                                           | 1.46 | CRTAP_HUMAN |
| 104 Exportin-T (XPOT)                                                              | 1.46 | XPOT_HUMAN  |
| 105 BAG family molecular chaperone regulator 5 (BAG5)                              | 1.46 | BAG5_HUMAN  |
| 106 Supervillin (SVIL)                                                             | 1.46 | SVIL_HUMAN  |
| 107 UDP-glucose pyrophosphorylase 2(UGP2)                                          | 1.45 | UGPA_HUMAN  |
| 108 ERO1-like protein alpha (ERO1L)                                                | 1.45 | ERO1A_HUMAN |
| 109 Peroxiredoxin 3 (PRDX3)                                                        | 1.45 | PRDX3_HUMAN |
| 110 Probable cytosolic iron-sulfur protein assembly protein CIAO1 (CIAO1)          | 1.44 | CIAO1_HUMAN |
| 111 Heat shock cognate 71 kDa protein (HSPA8)                                      | 1.44 | HSP7C_HUMAN |
| 112 ATP-dependent DNA helicase Q1 (RECQL)                                          | 1.44 | RECQ1_HUMAN |
| 113 Dihydropyrimidinase like 3 (DPYSL3)                                            | 1.43 | DPYL3_HUMAN |
| 114 Proliferating cell nuclear antigen (PCNA)                                      | 1.42 | PCNA_HUMAN  |
| 115 Procollagen-lysine,2-oxoglutarate 5-dioxygenase 3 (PLOD3)                      | 1.41 | PLOD3_HUMAN |
| 116 Serine/threonine kinase 24 (STK24)                                             | 1.41 | STK24_HUMAN |
| 117 Transitional endoplasmic reticulum ATPase (VCP)                                | 1.41 | TERA_HUMAN  |
| 118 Phosphoglucomutase 2 (PGM2)                                                    | 1.41 | PGM2_HUMAN  |
| 119 Proteasome activator subunit 3 (PSME3)                                         | 1.40 | PSME3_HUMAN |
| 120 Filamin C (FLNC)                                                               | 1.40 | FLNC_HUMAN  |
| 121 Glutamine--tRNA ligase (QARS)                                                  | 1.40 | SYQ_HUMAN   |
| 122 Hexokinase 2 (HK2)                                                             | 1.40 | HXK2_HUMAN  |
| 123 Protein FAM49A (FAM49A)                                                        | 1.40 | FA49A_HUMAN |
| 124 Calcineurin like phosphoesterase domain containing 1 (CPPED1)                  | 1.39 | CPPED_HUMAN |
| 125 Nicotinamide N-methyltransferase (NNMT)                                        | 1.39 | NNMT_HUMAN  |
| 126 Serine/threonine-protein kinase MRCK beta (CDC42BPB)                           | 1.39 | MRCKB_HUMAN |
| 127 Eukaryotic translation elongation factor 1 epsilon 1(EEF1E1)                   | 1.39 | MCA3_HUMAN  |
| 128 PDZ and LIM domain 5 (PDLIM5)                                                  | 1.39 | PDLI5_HUMAN |

|                                                                                     |                  |
|-------------------------------------------------------------------------------------|------------------|
| 129 Reticulocalbin-3 (RCN3)                                                         | 1.39 RCN3_HUMAN  |
| 130 Actin-related protein 3 (ACTR3)                                                 | 1.39 ARP3_HUMAN  |
| 131 Drebrin like (DBNL)                                                             | 1.39 DBNL_HUMAN  |
| 132 Transportin 3 (TNPO3)                                                           | 1.39 TNPO3_HUMAN |
| 133 Filamin A (FLNA)                                                                | 1.38 FLNA_HUMAN  |
| 134 tRNA-splicing ligase RtcB homolog (RTCB)                                        | 1.38 RTCB_HUMAN  |
| 135 Ubiquitin like modifier activating enzyme 6 (UBA6)                              | 1.38 UBA6_HUMAN  |
| 136 Nucleoporin 214 (NUP214)                                                        | 1.38 NU214_HUMAN |
| 137 NudC domain containing 1 (NUDCD1)                                               | 1.38 NUDC1_HUMAN |
| 138 Ras GTPase-activating-like protein (IQGAP1)                                     | 1.37 IQGA1_HUMAN |
| 139 Replication protein A 70 kDa DNA-binding subunit (RPA1)                         | 1.37 RFA1_HUMAN  |
| 140 Acetyl-CoA carboxylase beta (ACACB)                                             | 1.37 ACACB_HUMAN |
| 141 Actin related protein 2/3 complex subunit 5 (ARPC5)                             | 1.37 ARPC5_HUMAN |
| 142 Cullin 2 (CUL2)                                                                 | 1.37 CUL2_HUMAN  |
| 143 Histidine-tRNA ligase, cytoplasmic (HARS)                                       | 1.37 SYHC_HUMAN  |
| 144 Phosphoglycerate mutase 1 (PGAM1)                                               | 1.37 PGAM1_HUMAN |
| 145 Aminoacyl tRNA synthetase complex interacting multifunctional protein 1 (AIMP1) | 1.36 AIMP1_HUMAN |
| 146 Dihydropyrimidinase like 2 (DPYSL2)                                             | 1.36 DPYL2_HUMAN |
| 147 WD repeat domain 61 (WDR61)                                                     | 1.36 WDR61_HUMAN |
| 148 Nuclear cap-binding protein subunit 1 (NCBP1)                                   | 1.36 NCBP1_HUMAN |
| 149 Small nuclear ribonucleoprotein U5 subunit 200 (SNRNP200)                       | 1.36 U520_HUMAN  |
| 150 Inorganic pyrophosphatase (PPA1)                                                | 1.36 IPYR_HUMAN  |
| 151 Endoplasmic reticulum aminopeptidase 1 (ERAP1)                                  | 1.36 ERAP1_HUMAN |
| 152 Pre-mRNA-processing factor 19 (PRPF19)                                          | 1.36 PRP19_HUMAN |
| 153 Fructose-2,6-bisphosphatase (TIGAR)                                             | 1.35 TIGAR_HUMAN |
| 154 Gelsolin (GSN)                                                                  | 1.35 GELS_HUMAN  |
| 155 Nuclear pore complex protein Nup133 (NUP133)                                    | 1.34 NU133_HUMAN |
| 156 ADP-ribosylation factor 1 (ARF1)                                                | 1.34 ARF1_HUMAN  |
| 157 RelA-associated inhibitor (PPP1R13L)                                            | 1.34 IASPP_HUMAN |
| 158 Multifunctional protein ADE2 (PAICS)                                            | 1.34 PUR6_HUMAN  |
| 159 Calcyclin binding protein (CACYBP)                                              | 1.34 CYBP_HUMAN  |
| 160 SPARC (SPARC)                                                                   | 1.34 SPRC_HUMAN  |
| 161 Heat shock 70 kDa protein 1-like (HSPA1L)                                       | 1.34 HS71L_HUMAN |
| 162 Heat shock protein beta-1 (HSPB1)                                               | 1.34 HSPB1_HUMAN |
| 163 MCTS1, re-initiation and release factor (MCTS1)                                 | 1.34 MCTS1_HUMAN |
| 164 Phosphomannomutase 2 (PMM2)                                                     | 1.34 PMM2_HUMAN  |
| 165 E3 ubiquitin-protein ligase HECTD1 (HECTD1)                                     | 1.34 HECD1_HUMAN |
| 166 Drebrin (DBN1)                                                                  | 1.34 DREB_HUMAN  |
| 167 Eukaryotic translation initiation factor 2 subunit 1 (EIF2S1)                   | 1.33 IF2A_HUMAN  |
| 168 Proteasome 26S subunit, ATPase 3 (PSMC3)                                        | 1.33 PRS6A_HUMAN |
| 169 Eukaryotic translation elongation factor 1 gamma (EEF1G)                        | 1.33 EF1G_HUMAN  |
| 170 Acyl-CoA thioesterase 7 (ACOT7)                                                 | 1.33 BACH_HUMAN  |
| 171 Laminin subunit beta 1(LAMB1)                                                   | 1.33 LAMB1_HUMAN |
| 172 Glucosidase 2 subunit beta (PRKCSH)                                             | 1.33 GLU2B_HUMAN |
| 173 2-Aminoethanethiol dioxygenase (ADO)                                            | 1.33 AEDO_HUMAN  |
| 174 Importin subunit alpha-4 (KPNA3)                                                | 1.33 IMA4_HUMAN  |
| 175 Ran-specific GTPase-activating protein (RANBP1)                                 | 1.33 RANG_HUMAN  |
| 176 Adenylyl cyclase-associated protein 1 (CAP1)                                    | 1.32 CAP1_HUMAN  |
| 177 DNA mismatch repair protein (MSH2)                                              | 1.32 MSH2_HUMAN  |
| 178 Aldolase, fructose-bisphosphate A (ALDOA)                                       | 1.32 ALDOA_HUMAN |
| 179 Heat shock 70 kDa protein 1A                                                    | 1.32 HS71A_HUMAN |
| 180 Heat shock 70 kDa protein 1B                                                    | 1.32 HS71B_HUMAN |
| 181 Ubiquitin-conjugating enzyme E2 N (UBE2N)                                       | 1.32 UBE2N_HUMAN |
| 182 UDP-N-acetylglucosamine pyrophosphorylase 1 (UAP1)                              | 1.32 UAP1_HUMAN  |
| 183 Phosphate cytidyltransferase 1, choline, alpha (PCYT1A)                         | 1.32 PCY1A_HUMAN |
| 184 Peroxiredoxin 2 (PRDX2)                                                         | 1.32 PRDX2_HUMAN |
| 185 Protein flightless-1 homolog (FLII)                                             | 1.31 FLII_HUMAN  |
| 186 Catenin alpha 1 (CTNNA1)                                                        | 1.31 CTNA1_HUMAN |
| 187 RAB GTPase activating protein 1 (RABGAP1)                                       | 1.31 RBGP1_HUMAN |
| 188 RuvB like AAA ATPase 2 (RUVBL2)                                                 | 1.31 RUVB2_HUMAN |
| 189 Calumenin (CALU)                                                                | 1.31 CALU_HUMAN  |
| 190 SUMO-activating enzyme subunit 2 (UBA2)                                         | 1.31 SAE2_HUMAN  |
| 191 Signal recognition particle 54 kDa protein (SRP54)                              | 1.31 SRP54_HUMAN |
| 192 Procollagen-lysine,2-oxoglutarate 5-dioxygenase 2 (PLOD2)                       | 1.30 PLOD2_HUMAN |
| 193 Ribosomal protein S13 (RPS13)                                                   | 1.30 RS13_HUMAN  |



|                                                                                              |      |              |
|----------------------------------------------------------------------------------------------|------|--------------|
| 194 Tubulin beta-4A chain (TUBB4A)                                                           | 1.30 | TBB4A_HUMAN  |
| 195 5-Aminoimidazole-4-carboxamide ribonucleotide formyltransferase/IMP cyclohydrolase(ATIC) | 1.30 | PUR9_HUMAN   |
| 196 Heat shock protein 105 kDa (HSPH1)                                                       | 1.29 | HS105_HUMAN  |
| 197 Chromobox protein homolog 3 (CBX3)                                                       | 1.29 | CBX3_HUMAN   |
| 198 Chloride intracellular channel protein 4 (CLIC4)                                         | 1.29 | CLIC4_HUMAN  |
| 199 A-kinase anchoring protein 12 (AKAP12)                                                   | 1.29 | AKA12_HUMAN  |
| 200 Ras-related protein Rab-32 (RAB32)                                                       | 1.29 | RAB32_HUMAN  |
| 201 Diaphanous related formin 1 (DIAPH1)                                                     | 1.29 | DIAP1_HUMAN  |
| 202 WD repeat domain 1 (WDR1)                                                                | 1.29 | WDR1_HUMAN   |
| 203 Chaperonin containing TCP1 subunit 7 (CCT7)                                              | 1.29 | TCPH_HUMAN   |
| 204 Actin, cytoplasmic 1 (ACTB)                                                              | 1.29 | ACTB_HUMAN   |
| 205 Heterogeneous nuclear ribonucleoprotein R (HNRNPR)                                       | 1.29 | HNRPR_HUMAN  |
| 206 Calponin 2 (CNN2)                                                                        | 1.29 | CNN2_HUMAN   |
| 207 EH domain-containing protein 4 (EHD4)                                                    | 1.29 | EHD4_HUMAN   |
| 208 Stromal cell derived factor 4 (SDF4)                                                     | 1.29 | CAB45_HUMAN  |
| 209 Adenylate kinase 1 (AK1)                                                                 | 1.29 | KAD1_HUMAN   |
| 210 Talin-1 (TLN1)                                                                           | 1.29 | TLN1_HUMAN   |
| 211 Nuclear mitotic apparatus protein 1 (NUMA1)                                              | 1.29 | NUMA1_HUMAN  |
| 212 Importin-9 (IPO9)                                                                        | 1.29 | IPO9_HUMAN   |
| 213 Ran GTPase-activating protein 1 (RANGAP1)                                                | 1.29 | RAGP1_HUMAN  |
| 214 Splicing factor 1 (SF1)                                                                  | 1.29 | SF01_HUMAN   |
| 215 Peptidyl-prolyl cis-trans isomerase (FKBP4)                                              | 1.29 | FKBP4_HUMAN  |
| 216 E3 SUMO-protein ligase RanBP2 (RANBP2)                                                   | 1.28 | RBP2_HUMAN   |
| 217 Exportin-1 (XPO1)                                                                        | 1.28 | XPO1_HUMAN   |
| 218 Cathepsin B (CTSB)                                                                       | 1.28 | CATB_HUMAN   |
| 219 Protein disulfide isomerase family A member 3 (PDIA3)                                    | 1.28 | PDIA3_HUMAN  |
| 220 SUMO1 activating enzyme subunit 1 (SAE1)                                                 | 1.28 | SAE1_HUMAN   |
| 221 SEC23-interacting protein (SEC23IP)                                                      | 1.27 | S23IP_HUMAN  |
| 222 Ribosome maturation protein SBDS (SBDS)                                                  | 1.27 | SBDS_HUMAN   |
| 223 Adaptor related protein complex 3 beta 1 subunit (AP3B1)                                 | 1.27 | AP3B1_HUMAN  |
| 224 FK506 binding protein 15(FKBP15)                                                         | 1.27 | FKB15_HUMAN  |
| 225 Transducin beta like 3(TBL3)                                                             | 1.26 | TBL3_HUMAN   |
| 226 Glutaredoxin-3 (GLRX3)                                                                   | 1.26 | GLRX3_HUMAN  |
| 227 Heterogeneous nuclear ribonucleoprotein C (C1/C2)(HNRNPC)                                | 1.26 | HNRPC_HUMAN  |
| 228 Methionyl-tRNA synthetase (MARS)                                                         | 1.26 | SYMC_HUMAN   |
| 229 Methionine adenosyltransferase 2A (MAT2A)                                                | 1.26 | METK2_HUMAN  |
| 230 Diaphanous related formin 2 (DIAPH2)                                                     | 1.26 | Q17R91_HUMAN |
| 231 78 kDa glucose-regulated protein (HSPA5)                                                 | 1.26 | GRP78_HUMAN  |
| 232 T-complex protein 1 subunit zeta (CCT6A)                                                 | 1.26 | TCPZ_HUMAN   |
| 233 Lamin-B1 (LNB1)                                                                          | 1.25 | LMNB1_HUMAN  |
| 234 Scaffold attachment factor B2                                                            | 1.25 | SAFB2_HUMAN  |
| 235 Importin subunit alpha-5 (KPNA1)                                                         | 1.25 | IMA5_HUMAN   |
| 236 Thioredoxin domain containing 5 (TXNDC5)                                                 | 1.25 | TXND5_HUMAN  |
| 237 Reticulocalbin 1 (RCN1)                                                                  | 1.25 | RCN1_HUMAN   |
| 238 Cysteinyl-tRNA synthetase (CARS)                                                         | 1.25 | SYCC_HUMAN   |
| 239 Tropomodulin-3 (TMOD3)                                                                   | 1.25 | TMOD3_HUMAN  |
| 240 Histone-binding protein RBBP7 (RBBP7)                                                    | 1.25 | RBBP7_HUMAN  |
| 241 Fascin (FSCN1)                                                                           | 1.25 | FSCN1_HUMAN  |
| 242 Ras suppressor protein 1 (RSU1)                                                          | 1.24 | RSU1_HUMAN   |
| 243 Glutamate-cysteine ligase regulatory subunit (GCLM)                                      | 1.24 | GSH0_HUMAN   |
| 244 Clathrin light chain A (CLTA)                                                            | 1.24 | CLCA_HUMAN   |
| 245 Arginyl-tRNA synthetase (RARS)                                                           | 1.24 | SYRC_HUMAN   |
| 246 T-complex protein 1 subunit epsilon (CCT5)                                               | 1.24 | TCPE_HUMAN   |
| 247 Polypyrimidine tract binding protein 1 (PTBP1)                                           | 1.24 | PTBP1_HUMAN  |
| 248 Aldo-keto reductase family 1 member C3 (AKR1C3)                                          | 1.24 | AK1C3_HUMAN  |
| 249 Proteasome 26S subunit, non-ATPase 12 (PSMD12)                                           | 1.24 | PSD12_HUMAN  |
| 250 Adenylosuccinate synthetase isozyme 2 (ADSS)                                             | 1.24 | PURA2_HUMAN  |
| 251 SON DNA binding protein (SON)                                                            | 1.24 | SON_HUMAN    |
| 252 Serine/threonine-protein kinase PRP4 homolog (PRPF4B)                                    | 1.24 | PRP4B_HUMAN  |
| 253 Tubulin beta chain (TUBB)                                                                | 1.24 | TBB5_HUMAN   |
| 254 Component of oligomeric golgi complex 1 (COG1)                                           | 1.24 | COG1_HUMAN   |
| 255 Lysyl-tRNA synthetase (KARS)                                                             | 1.23 | SYK_HUMAN    |
| 256 Histone deacetylase 2(HDAC2)                                                             | 1.23 | HDAC2_HUMAN  |
| 257 Cytochrome c, somatic (CYCS)                                                             | 1.23 | CYC_HUMAN    |
| 258 Synaptotagmin binding cytoplasmic RNA interacting protein (SYNCRIP)                      | 1.23 | HNRPQ_HUMAN  |

|                                                                                            |      |              |
|--------------------------------------------------------------------------------------------|------|--------------|
| 259 Ubiquitin specific peptidase 39 (USP39)                                                | 1.23 | SNUT2_HUMAN  |
| 260 Histone deacetylase 1 (HDAC1)                                                          | 1.23 | HDAC1_HUMAN  |
| 261 Peroxiredoxin-1 (PRDX1)                                                                | 1.23 | PRDX1_HUMAN  |
| 262 Sulfotransferase family cytosolic 1B member 1 (SULT1B1)                                | 1.23 | ST1B1_HUMAN  |
| 263 Aspartyl-tRNA synthetase (DARS)                                                        | 1.22 | SYDC_HUMAN   |
| 264 Tubulin beta-4B chain (TUBB4B)                                                         | 1.22 | TBB4B_HUMAN  |
| 265 Calpastatin (CAST)                                                                     | 1.22 | ICAL_HUMAN   |
| 266 Adaptor related protein complex 3 delta 1 subunit (AP3D1)                              | 1.22 | AP3D1_HUMAN  |
| 267 Vinculin (VCL)                                                                         | 1.22 | VINC_HUMAN   |
| 268 Tripartite motif containing 28 (TRIM28)                                                | 1.21 | TIF1B_HUMAN  |
| 269 Utrophin (UTRN)                                                                        | 1.21 | UTRO_HUMAN   |
| 270 Ubiquitin protein ligase E3C (UBE3C)                                                   | 1.21 | UBE3C_HUMAN  |
| 271 C-Jun-amino-terminal kinase-interacting protein 4 (SPAG9)                              | 1.21 | JIP4_HUMAN   |
| 272 Microtubule-actin cross-linking factor 1, isoforms 1/2/3/5 (MACF1)                     | 1.21 | E9PLY5_HUMAN |
| 273 Hypoxia up-regulated 1 (HYOU1)                                                         | 1.21 | HYOU1_HUMAN  |
| 274 Serum deprivation-response protein (SDPR)                                              | 1.20 | SDPR_HUMAN   |
| 275 Carbamoyl-phosphate synthetase 2, aspartate transcarbamylase, and dihydroorotase (CAD) | 1.20 | PYR1_HUMAN   |
| 276 26S proteasome non-ATPase regulatory subunit 1 (PSMD1)                                 | 1.20 | PSMD1_HUMAN  |
| 277 CAP-Gly domain containing linker protein 1 (CLIP1)                                     | 1.20 | CLIP1_HUMAN  |
| 278 14-3-3 protein gamma (1433G)                                                           | 1.20 | 1433G_HUMAN  |
| 279 Phosphofructokinase, platelet (PFKP)                                                   | 1.20 | PFKAP_HUMAN  |
| 280 Rho-associated protein kinase 1 (ROCK1)                                                | 1.20 | ROCK1_HUMAN  |
| 281 Protein phosphatase 1 regulatory subunit 14B (PPP1R14B)                                | 1.20 | PP14B_HUMAN  |
| 282 Protein S100-A13 (S100A13)                                                             | 1.20 | S10AD_HUMAN  |
| 283 Adaptor protein (CRK)                                                                  | 1.19 | CRK_HUMAN    |
| 284 Trifunctional purine biosynthetic protein adenosine-3 (GART)                           | 1.19 | PUR2_HUMAN   |
| 285 40S ribosomal protein S17-like (RPS17L)                                                | 1.19 | RS17_HUMAN   |
| 286 Kinesin-1 heavy chain (KIF5B)                                                          | 1.19 | KINH_HUMAN   |
| 287 Rho-associated protein kinase 2 (ROCK2)                                                | 1.19 | ROCK2_HUMAN  |
| 288 Autophagy related 7 (ATG7)                                                             | 1.19 | ATG7_HUMAN   |
| 289 Actin related protein 2/3 complex subunit 1A (ARPC1A)                                  | 1.19 | ARC1A_HUMAN  |
| 290 Prolyl 4-hydroxylase subunit alpha 1 (P4HA1)                                           | 1.18 | P4HA1_HUMAN  |
| 291 Probable rRNA-processing protein EBP2 (EBNA1BP2)                                       | 1.18 | EBP2_HUMAN   |
| 292 Calreticulin (CALR)                                                                    | 1.18 | CALR_HUMAN   |
| 293 Isoform 2 of BH3-interacting domain death agonist (BID)                                | 1.18 | BID_HUMAN    |
| 294 Leucyl-tRNA synthetase (LARS)                                                          | 1.18 | SYLC_HUMAN   |
| 295 Staphylococcal nuclease domain-containing protein 1 (SND1)                             | 1.18 | SND1_HUMAN   |
| 296 RAC-alpha serine/threonine-protein kinase (AKT1)                                       | 1.18 | AKT1_HUMAN   |
| 297 Phosphoprotein enriched in astrocytes 15 (PEA15)                                       | 1.18 | PEA15_HUMAN  |
| 298 Proteasome 26S subunit, ATPase 6 (PSMC6)                                               | 1.18 | PRS10_HUMAN  |
| 299 ATP-dependent RNA helicase A (DHX9)                                                    | 1.17 | DHX9_HUMAN   |
| 300 Nicotinate phosphoribosyltransferase (NAPRT)                                           | 1.17 | PNCB_HUMAN   |
| 301 Microtubule-actin crosslinking factor 1 (MACF1)                                        | 1.17 | MACF1_HUMAN  |
| 302 Myristoylated alanine-rich C-kinase substrate (MARCKS)                                 | 1.17 | MARCS_HUMAN  |
| 303 GDP-mannose pyrophosphorylase B (GMPPB)                                                | 1.17 | GMPPB_HUMAN  |
| 304 Ubiquitin like modifier activating enzyme 1 (UBA1)                                     | 1.16 | UBA1_HUMAN   |
| 305 Kinesin family member 13B (KIF13B)                                                     | 1.16 | KI13B_HUMAN  |
| 306 Protein disulfide-isomerase A4 (PDIA4)                                                 | 1.16 | PDIA4_HUMAN  |
| 307 Ribosomal protein L32 (RPL32)                                                          | 1.16 | RL32_HUMAN   |
| 308 Deducator of cytokinesis protein 6 (DOCK6)                                             | 1.16 | DOCK6_HUMAN  |
| 309 Tight junction protein 1 (TJP1)                                                        | 1.15 | ZO1_HUMAN    |
| 310 Pre-rRNA processing protein FTSJ3 (FTSJ3)                                              | 1.15 | SPB1_HUMAN   |
| 311 Basement membrane-specific heparan sulfate proteoglycan core protein (HSPG2)           | 1.15 | PGBM_HUMAN   |
| 312 Protein phosphatase 1 regulatory subunit 12A (PPP1R12A)                                | 1.15 | MYPT1_HUMAN  |
| 313 Mago homolog, exon junction complex core component (MAGOH)                             | 1.13 | MGN_HUMAN    |
| 314 Family with sequence similarity 129 member B (FAM129B)                                 | 1.13 | NIBL1_HUMAN  |
| 315 Leucine aminopeptidase 3 (LAP3)                                                        | 1.13 | AMPL_HUMAN   |
| 316 UPF0568 protein C14orf166 (C14orf166)                                                  | 1.13 | CN166_HUMAN  |
| 317 Bifunctional glutamate/proline-tRNA ligase (EPRS)                                      | 1.12 | SYEP_HUMAN   |
| 318 NCK associated protein 1 (NCKAP1)                                                      | 1.11 | NCKP1_HUMAN  |
| 319 Proteasome 26S subunit, non-ATPase 3(PSMD3)                                            | 1.11 | PSMD3_HUMAN  |
| 320 Transglutaminase 2 (TGM2)                                                              | 1.11 | TGM2_HUMAN   |
| 321 Eukaryotic translation initiation factor 5B (EIF5B)                                    | 1.11 | IF2P_HUMAN   |
| 322 Dynein light chain 1, cytoplasmic (DYNLL1)                                             | 1.11 | DYL1_HUMAN   |
| 323 Cytoplasmic dynein 1 heavy chain 1 (DYNC1H1)                                           | 1.11 | DYHC1_HUMAN  |

|                                                           |      |             |
|-----------------------------------------------------------|------|-------------|
| 324 Peptidyl-prolyl cis-trans isomerase (FKBP5)           | 1.10 | FKBP5_HUMAN |
| 325 Actin-related protein 2/3 complex subunit 1B (ARPC1B) | 1.10 | ARC1B_HUMAN |
| 326 ATP-dependent RNA helicase (DDX1)                     | 1.10 | DDX1_HUMAN  |
| 327 Poly(rC)-binding protein 1 (PCBP1)                    | 1.10 | PCBP1_HUMAN |
| 328 Unconventional myosin-Ie (MYO1E)                      | 1.09 | MYO1E_HUMAN |
| 329 Dynamin 1 like (DNM1L)                                | 1.09 | DNM1L_HUMAN |
| 330 interleukin enhancer binding factor 3 (ILF3)          | 1.08 | ILF3_HUMAN  |
| 331 Hepatoma-derived growth factor (HDGF)                 | 1.08 | HDGF_HUMAN  |

Table S2. 49 Proteins decreased in high glucose culture.

| No | Protein                                                                               | Fraction of control | UNIPROT entry name |
|----|---------------------------------------------------------------------------------------|---------------------|--------------------|
| 1  | Copine-1 (CPNE1)                                                                      | 0.19                | CPNE1_HUMAN        |
| 2  | Annexin A1 (ANXA1)                                                                    | 0.19                | ANXA1_HUMAN        |
| 3  | Annexin A5 (ANXA5)                                                                    | 0.26                | ANXA5_HUMAN        |
| 4  | Adipogenesis regulatory factor (ADIRF)                                                | 0.40                | ADIRF_HUMAN        |
| 5  | Proline-rich and coiled-coil-containing protein 1 (PRRC1)                             | 0.47                | PRRC1_HUMAN        |
| 6  | Zinc finger CCCH domain-containing protein 18 (ZC3H18)                                | 0.52                | ZCH18_HUMAN        |
| 7  | RNA-binding protein 4 (RBM4)                                                          | 0.52                | RBM4_HUMAN         |
| 8  | RNA-binding motif, single-stranded-interacting protein 1 (RBMS1)                      | 0.52                | RBMS1_HUMAN        |
| 9  | Cell division cycle protein 16 homolog (CDC16)                                        | 0.54                | CDC16_HUMAN        |
| 10 | Putative helicase (MOV10)                                                             | 0.56                | MOV10_HUMAN        |
| 11 | Endophilin-A2 (SH3GL1)                                                                | 0.59                | SH3G1_HUMAN        |
| 12 | Ras-related protein Rab-7a                                                            | 0.59                | RAB7A_HUMAN        |
| 13 | Nucleoporin 153 (NU153)                                                               | 0.62                | NU153_HUMAN        |
| 14 | Triple functional domain protein (TRIO)                                               | 0.64                | TRIO_HUMAN         |
| 15 | Tetratricopeptide repeat protein 37 (TTC37)                                           | 0.64                | TTC37_HUMAN        |
| 16 | Syntaxin-12 (STX12)                                                                   | 0.64                | STX12_HUMAN        |
| 17 | Microfibrillar-associated protein 1 (MFAP1)                                           | 0.64                | MFAP1_HUMAN        |
| 18 | Eukaryotic translation initiation factor 4E (EIF4E)                                   | 0.65                | IF4E_HUMAN         |
| 19 | ATP-dependent RNA helicase (DDX54)                                                    | 0.66                | DDX54_HUMAN        |
| 20 | Phosphatidylinositol-binding clathrin assembly protein (PICALM)                       | 0.66                | PICAL_HUMAN        |
| 21 | Cytokine-induced apoptosis inhibitor 1 (CIAPIN1)                                      | 0.67                | CPIN1_HUMAN        |
| 22 | Muscle blind-like protein 1 (MBNL1)                                                   | 0.68                | MBNL1_HUMAN        |
| 23 | Alpha-synuclein (SNCA)                                                                | 0.70                | SYUA_HUMAN         |
| 24 | Cell growth-regulating nucleolar protein (LYAR)                                       | 0.70                | LYAR_HUMAN         |
| 25 | Chromobox protein homolog 5 (CBX5)                                                    | 0.70                | CBX5_HUMAN         |
| 26 | 60S ribosomal protein L35 (RPL35)                                                     | 0.70                | RL35_HUMAN         |
| 27 | Putative phospholipase B-like 2 (PLBD2)                                               | 0.72                | PLBL2_HUMAN        |
| 28 | Adenylyl cyclase-associated protein 2 (CAP2)                                          | 0.72                | CAP2_HUMAN         |
| 29 | UBX domain-containing protein 1 (UBXN1)                                               | 0.73                | UBXN1_HUMAN        |
| 30 | Cohesin subunit SA-2 (STAG2)                                                          | 0.73                | STAG2_HUMAN        |
| 31 | RNA-binding protein Nova-2 (NOVA2)                                                    | 0.73                | NOVA2_HUMAN        |
| 32 | Pumilio homolog 3 (PUM3)                                                              | 0.73                | PUM3_HUMAN         |
| 33 | 40S ribosomal protein S20 (RPS20)                                                     | 0.74                | RS20_HUMAN         |
| 34 | Bystin (BYSL)                                                                         | 0.74                | BYST_HUMAN         |
| 35 | 40S ribosomal protein S2 (RPS2)                                                       | 0.76                | RS2_HUMAN          |
| 36 | NHL repeat-containing protein 2 (NHLRC2)                                              | 0.77                | NHLC2_HUMAN        |
| 37 | X-ray repair cross-complementing protein 5 (XRCC5)                                    | 0.77                | XRCC5_HUMAN        |
| 38 | U3 small nucleolar RNA-associated protein 6 homolog (UTP6)                            | 0.78                | UTP6_HUMAN         |
| 39 | Glyoxalase 1 (GLO1)                                                                   | 0.79                | LGUL_HUMAN         |
| 40 | Transcription elongation factor A protein 1 (TCEA1)                                   | 0.79                | TCEA1_HUMAN        |
| 41 | D-3-Phosphoglycerate dehydrogenase (PHGDH)                                            | 0.81                | SERA_HUMAN         |
| 42 | Nucleolar complex protein 4 homolog (NOC4L)                                           | 0.82                | NOC4L_HUMAN        |
| 43 | Striatin-interacting protein 1 (STRIP1)                                               | 0.83                | STRP1_HUMAN        |
| 44 | 26S proteasome non-ATPase regulatory subunit 4 (PSMD4)                                | 0.84                | PSMD4_HUMAN        |
| 45 | 60S ribosomal protein L13a (RPL13A)                                                   | 0.84                | RL13A_HUMAN        |
| 46 | Interferon-inducible double-stranded RNA-dependent protein kinase activator A (PRKRA) | 0.85                | PRKRA_HUMAN        |
| 47 | 60S ribosomal protein L5 (RPL5)                                                       | 0.86                | RL5_HUMAN          |
| 48 | Lambda-crystallin homolog (CRYL1)                                                     | 0.91                | CRYL1_HUMAN        |
| 49 | Proliferation-associated protein 2G4 (PA2G4)                                          | 0.93                | PA2G4_HUMAN        |

Table S3

| Protein no | Protein                                           | Number of sites | Total arg | MG Modification sites                                         | MG Modification sites in the RBD |
|------------|---------------------------------------------------|-----------------|-----------|---------------------------------------------------------------|----------------------------------|
| 1          | Pyruvate kinase-M (PKM)                           | 11              | 31        | R43, R56, R73, R106, R120, R278, R376, R383, R400, R461, R455 | R43                              |
| 2          | $\beta$ -Actin (ACTB)                             | 9               | 19        | R37, R39, R62, R177, R183, R196, R206, R256, R312             | R37, R39, R196, R256, R312       |
| 3          | $\alpha$ -Enolase (ENO1)                          | 9               | 17        | R15, R32, R50, R56, R132, R179, R183, R269, R412              | R50, R56                         |
| 4          | Heat shock protein HSP 90-beta (HSP90AB1)         | 9               | 32        | R41, R82, R168, R197, R330, R338, R475, R504, R612            | R82                              |
| 5          | Moesin (MOES)                                     | 7               | 40        | R184, R233, R246, R427, R435, R460, R533                      | R233                             |
| 6          | Transketolase (TKT)                               | 6               | 29        | R246, R334, R474, R530, R609, R617                            | R474                             |
| 7          | Actin, $\gamma$ -enteric smooth muscle (ACTG2)    | 6               | 18        | R29, R38, R40, R63, R184, R257                                | R38, R40, R257                   |
| 8          | Glucose-6-phosphate isomerase (G6PI)              | 6               | 27        | R66, R83, R96, R106, R370, R438                               | R83                              |
| 9          | Tubulin alpha-1A chain                            | 6               | 21        | R64, R79, R105, R121, R123, R221                              | R121, R123                       |
| 10         | Heat shock protein HSP 90-alpha (HSP90AA1)        | 6               | 30        | R46, R87, R201, R202, R620, R647                              | R87, R201, R202, R620, R647      |
| 11         | Aldehyde dehydrogenase 16A1 (A16A1)               | 5               | 58        | R117, R322, R334, R567, R629                                  | R322                             |
| 12         | Glyceraldehyde-3-phosphate dehydrogenase (G3P)    | 5               | 10        | R80, R118, R200, R234, R248                                   | R80                              |
| 13         | Tropomyosin $\alpha$ 4 chain (TPM4)               | 5               | 17        | R27, R55, R89, R97, R123                                      | R27, R55, R123                   |
| 14         | 14-3-3 protein beta (1433B)                       | 4               | 10        | R20, R43, R62, R129                                           | R20, R43                         |
| 15         | 14-3-3 protein zeta (1433Z)                       | 4               | 11        | R41, R56, R60, R127                                           | R41, R56                         |
| 16         | Actin, cytoplasmic 2 (ACTG1)                      | 4               | 13        | R28, R37, R39, R62                                            | R37, R39                         |
| 17         | Alpha-actin-1 (ACTA1)                             | 4               | 10        | R39, R41, R64, R97                                            | R39, R41                         |
| 18         | Alpha-actin-2 (ACTA2)                             | 4               | 16        | R39, R41, R185, R258                                          | R39, R41, R258                   |
| 19         | $\beta$ -Actin-like protein 2 (ACTBL2)            | 4               | 20        | R184, R197, R207, R257                                        | R197, R257                       |
| 20         | Annexin A1 (ANXA1)                                | 4               | 19        | R124, R144, R177, R228                                        | R124, R144, R228                 |
| 21         | Elongation factor 2 (EEF2)                        | 4               | 44        | R10, R20, R506, R726                                          | R726                             |
| 22         | Heat shock cognate 71 kDa protein (HSPA8)         | 4               | 28        | R77, R100, R301, R342                                         | R77, R100                        |
| 23         | L-lactate dehydrogenase A chain (LDHA)            | 4               | 11        | R99, R157, R169, R315                                         | R99, R169                        |
| 24         | Phosphoglycerate kinase 1 (PGK1)                  | 4               | 11        | R39, R151, R171, R206                                         | R39                              |
| 25         | Protein disulfide-isomerase A3 (PDIA3)            | 4               | 23        | R37, R304, R326, R423                                         |                                  |
| 26         | T-complex protein 1 subunit beta (CCT2)           | 4               | 22        | R57, R89, R138, R156                                          | R57, R156                        |
| 27         | Thyroid autoantigen 70kDa (XRCC6)                 | 4               | 32        | R35, R194, R290, R301                                         | R35, R194, R301                  |
| 28         | Tropomyosin $\alpha$ 3 chain (TPM3)               | 4               | 18        | R126, R134, R161, R168                                        | R126, R161                       |
| 29         | 14-3-3 protein gamma (1433G)                      | 3               | 13        | R12, R19, R61                                                 | R19                              |
| 30         | 40S ribosomal protein S3 (RPS3)                   | 3               | 18        | R45, R67, R76                                                 | R45, R67, R76                    |
| 31         | 78 kDa glucose-regulated protein (GRP78)          | 3               | 28        | R97, R101, R181                                               | R181                             |
| 32         | Aspartate aminotransferase, cytoplasmic (AATM)    | 3               | 21        | R68, R337, R407                                               | R337                             |
| 33         | Elongation factor 1-alpha 2 (EEF1A2)              | 3               | 18        | R134, R427, R430                                              | R134, R430                       |
| 34         | Ezrin (EZR)                                       | 3               | 46        | R40, R151, R246                                               |                                  |
| 35         | Inosine-5'-monophosphate dehydrogenase 2 (IMPDH2) | 3               | 22        | R182, R412, R493                                              | R182, R412, R493                 |
| 36         | L-lactate dehydrogenase B chain (LDHB)            | 3               | 8         | R107, R170, R172                                              | R107, R170, R172                 |
| 37         | Proteasome subunit B5 (PSMB5)                     | 3               | 18        | R68, R132, R166                                               | R132, R166                       |
| 38         | Ribosomal protein L5 (RPL5)                       | 3               | 24        | R179, R209, R248                                              | R179                             |

|    |                                                    |   |    |                  |            |
|----|----------------------------------------------------|---|----|------------------|------------|
| 39 | Ribosomal protein L15 (RL15)                       | 3 | 25 | R96, R105, R108  | R105       |
| 40 | T-complex protein 1 subunit delta (TPCD)           | 3 | 28 | R49, R206, R240  |            |
| 41 | Transitional endoplasmic reticulum ATPase (VCP)    | 3 | 58 | R225, R287, R323 | R287, R323 |
| 42 | Triosephosphate isomerase (TPI1)                   | 3 | 11 | R137, R172, R243 | R137, R172 |
| 43 | Tubulin beta (TUBB)                                | 3 | 22 | R121, R241, R251 | R121, R251 |
| 44 | Tumor protein D54 (TPD52L2)                        | 3 | 8  | R153, R170, R182 | R170, R182 |
| 45 | 14-3-3 protein epsilon (1433E)                     | 2 | 14 | R57, R61         | R57        |
| 46 | 14-3-3 protein eta (1433F)                         | 2 | 12 | R42, R61         | R42        |
| 47 | 40S ribosomal protein S7 (TPD54)                   | 2 | 14 | R41, R120        | R120       |
| 48 | 40S ribosomal protein S8 (RPS8)                    | 2 | 23 | R77, R92         |            |
| 49 | 40S ribosomal protein S19 (RPS19)                  | 2 | 11 | R16, R56         |            |
| 50 | 60S ribosomal protein L7 (RPL7)                    | 2 | 27 | R154, R166       | R166       |
| 51 | 60S ribosomal protein L23a (RPL23A)                | 2 | 10 | R129, R139       |            |
| 52 | 60S acidic ribosomal protein P0 (RPLP0)            | 2 | 14 | R149, R247       |            |
| 53 | Aconitate hydratase, mitochondrial (ACO2)          | 2 | 35 | R607, R632       | R607       |
| 54 | Annexin A5 (ANXA5)                                 | 2 | 18 | R123, R245       |            |
| 55 | Alanine--tRNA ligase, cytoplasmic (AARS)           | 2 | 47 | R320, R751       |            |
| 56 | Caveolae-associated protein 1 (CAVIN1)             | 2 | 29 | R130, R329       | R329       |
| 57 | Far upstream element-binding protein 2 (KHSRP)     | 1 | 30 | R331, R340       |            |
| 58 | Filamin A (FLNA)                                   | 2 | 93 | R1060, R1782     |            |
| 59 | GTP-binding nuclear protein Ran (RAN)              | 2 | 9  | R29, R106        |            |
| 60 | Heat shock protein 70 kDa 1A (HSP71A)              | 2 | 41 | R342, R357       |            |
| 61 | Heterogeneous nuclear ribonucleoproteins C (HNRPC) | 2 | 18 | R17, R73         |            |
| 62 | Endoplasmic (HSP90B1)                              | 2 | 16 | R84, R102        |            |
| 63 | Nucleolin (NCL)                                    | 2 | 26 | R597, R599       |            |
| 64 | Peroxiredoxin-1 (PRDX1)                            | 2 | 6  | R110, R128       | R110       |
| 65 | Peroxiredoxin-5 (PRDX5)                            | 2 | 11 | R148, R180       |            |
| 66 | Peroxiredoxin-6 (PRDX6)                            | 2 | 12 | R132, R174       | R174       |
| 67 | Proteasome subunit A3 (PSMA3)                      | 2 | 13 | R72, R233        | R233       |
| 68 | Proteasome subunit A7 (PSMA7)                      | 2 | 18 | R38, R213        | R38, R213  |
| 69 | Protein disulfide-isomerase A1 (PDIA1)             | 2 | 15 | R106, R452       |            |
| 70 | Protein disulfide-isomerase A3 (PDIA3)             | 1 | 23 | R38              |            |
| 71 | Protein disulfide-isomerase A4 (PDIA4)             | 2 | 23 | R131, R155       | R155       |
| 72 | Rho GDP-dissociation inhibitor 2 (ARHGD1B)         | 2 | 6  | R131             |            |
| 73 | Ribose-phosphate pyrophosphokinase 2 (PRPS2)       | 2 | 15 | R177, R302       | R302       |
| 74 | Ribosomal protein L19 (RPL19)                      | 2 | 31 | R162, R163       | R162, R163 |
| 75 | Serine hydroxymethyltransferase (GLYC)             | 2 | 29 | R272, R355       |            |
| 76 | SH3 domain-binding protein 5-like (SH3BP5L)        | 2 | 40 | R19, R51         | R19, R51   |
| 77 | Stress-70 protein, mitochondrial (HSPA9)           | 2 | 35 | R146, R405       |            |
| 78 | Stress-induced-phosphoprotein 1 (STIP1)            | 2 | 27 | R355, R443       |            |
| 79 | T-complex protein 1 subunit theta (TPCQ)           | 2 | 18 | R165, R407       | R407       |
| 80 | Transglutaminase-2 (TGM2)                          | 2 | 38 | R476, R680       |            |
| 81 | TubulinTubulin alpha-1C chain (TUBA1C)             | 2 | 19 | R79, R105        |            |
| 82 | Vimentin (VIM)                                     | 2 | 43 | R401, R223       | R401       |
| 83 | WD repeat-containing protein 1 (WDR1)              | 2 | 18 | R116, R396       |            |

|     |                                                               |   |    |       |      |
|-----|---------------------------------------------------------------|---|----|-------|------|
| 84  | 10 kDa heat shock protein, mitochondrial (HSPE1)              | 1 | 4  | R20   |      |
| 85  | 40S Ribosomal protein S2 (RPS2)                               | 1 | 24 | R284  |      |
| 86  | 40S ribosomal protein S3a (RPS3A)                             | 1 | 14 | R174  | R284 |
| 87  | 40S ribosomal protein S4                                      | 1 | 22 | R77   |      |
| 88  | 40S ribosomal protein S6 (RPS6)                               | 1 | 31 | R31   | R77  |
| 89  | 40S ribosomal protein S9 (RPS9)                               | 1 | 16 | R24   | R31  |
| 90  | 40S ribosomal protein S10 (RPS10)                             | 1 | 16 | R8    |      |
| 91  | 40S ribosomal protein S11 (RPS11)                             | 1 | 14 | R22   |      |
| 92  | 40S ribosomal protein S18 (RPS18)                             | 1 | 20 | R86   | R22  |
| 93  | 40S ribosomal protein S27 (RPS27)                             | 1 | 2  | R23   | R86  |
| 94  | 60S acidic ribosomal protein P2 (RPLP2)                       | 1 | 2  | R38   | R23  |
| 95  | 60S ribosomal protein L6 (RPL6)                               | 1 | 23 | R156  | R38  |
| 96  | 60S ribosomal protein L10a (RPL10A)                           | 1 | 11 | R7    | R156 |
| 97  | 60S ribosomal protein L12 (RPL12)                             | 1 | 10 | R117  | R7   |
| 98  | 60S ribosomal protein L13 (RPL13)                             | 1 | 31 | R116  |      |
| 99  | 60S ribosomal protein L13a (RPL13A)                           | 1 | 22 | R12   | R116 |
| 100 | 60S ribosomal protein L22 (RPL22)                             | 1 | 6  | R65   | R12  |
| 101 | 60S ribosomal protein L27 (RPL27)                             | 1 | 13 | R102  | R65  |
| 102 | 60S Ribosomal protein L27a (RPL27A)                           | 1 | 13 | R105  |      |
| 103 | 60S ribosomal protein L30 (RPL30)                             | 1 | 5  | R17   |      |
| 104 | 60S ribosomal protein L31 (RPL31)                             | 1 | 16 | R14   | R17  |
| 105 | 60S ribosomal protein L34 (RPL34)                             | 1 | 14 | R93   | R14  |
| 106 | 116 kDa U5 small nuclear ribonucleoprotein component (EFTUD2) | 1 | 41 | R803  |      |
| 107 | Acidic leucine-rich nuclear phosphoprotein 32 (ANP32A)        | 1 | 11 | R150  |      |
| 108 | Actin related protein 2/3 complex subunit 1A (ARPC1A)         | 1 | 17 | R89   | R150 |
| 109 | Actin related protein 2/3 complex, 1B, 41kDa (ARPC1B)         | 1 | 17 | R179  |      |
| 110 | Actin-related protein 2/3 complex subunit 2 (ARPC2)           | 1 | 17 | R78   |      |
| 111 | Actin-related protein 2/3 complex subunit 4 (ARPC4)           | 1 | 12 | R158  | R179 |
| 112 | Actin-related protein 2/3 complex subunit 5 (ARPC5)           | 1 | 6  | R74   |      |
| 113 | Actin-related protein 3 (ACTR3)                               | 1 | 24 | R79   |      |
| 114 | Adenosylhomocysteinase (AHCY)                                 | 1 | 17 | R205  | R74  |
| 115 | S-Adenosylmethionine synthase isoform type-2 (MAT2A)          | 1 | 20 | R343  |      |
| 116 | ADP-ribose pyrophosphatase, mitochondrial (NUDT9)             | 1 | 21 | R247  |      |
| 117 | Alpha-actinin-4 (ACTN4)                                       | 1 | 47 | R869  | R343 |
| 118 | Annexin A2 (ANXA2)                                            | 1 | 21 | R168  | R247 |
| 119 | Annexin A2-like protein (ANXA2P2)                             | 1 | 20 | R168  | R869 |
| 120 | Arginine--tRNA ligase (RARS)                                  | 1 | 35 | R659  |      |
| 121 | Asparagine synthetase [glutamine-hydrolyzing] (ASNS)          | 1 | 27 | R143  |      |
| 122 | Asparagine--tRNA ligase, cytoplasmic (NARS)                   | 1 | 38 | R390  |      |
| 123 | Aspartate-tRNA ligase, cytoplasmic (DARS)                     | 1 | 34 | R320  |      |
| 124 | Astrocytic phosphoprotein PEA-15 (PEA15)                      | 1 | 6  | R101  | R390 |
| 125 | ATP-citrate synthase (ACLY)                                   | 1 | 48 | R607  | R320 |
| 126 | ATP-dependent 6-phosphofructokinase, platelet type (PFKP)     | 1 | 48 | R44   |      |
| 127 | ATP-dependent RNA helicase A (DHX9)                           | 1 | 73 | R447  |      |
| 128 | Bifunctional glutamate/proline-tRNA ligase (EPRS)             | 1 | 56 | R1463 |      |

|     |                                                                    |   |     |       |       |
|-----|--------------------------------------------------------------------|---|-----|-------|-------|
| 129 | Calreticulin (CALR)                                                | 1 | 8   | R222  |       |
| 130 | Casein kinase II subunit alpha (CSNK2A1)                           | 1 | 27  | R191  | R1463 |
| 131 | Casein kinase II subunit alpha 3 (CSNK2A3)                         | 1 | 28  | R191  | R222  |
| 132 | Cathepsin Z (CTSZ)                                                 | 1 | 21  | R199  |       |
| 133 | Coactosin-like protein (COTL1)                                     | 1 | 7   | R91   | R91   |
| 134 | Cytosolic acyl coenzyme A thioester hydrolase (ACOT7)              | 1 | 28  | R61   |       |
| 135 | Dihydropteridine reductase (QDPR)                                  | 1 | 9   | R236  | R236  |
| 136 | Dihydropyrimidinase-related protein 2 (DPYSL2)                     | 1 | 32  | R268  | R268  |
| 137 | DNA damage-binding protein 1 (DDB1)                                | 1 | 47  | R1138 |       |
| 138 | DNA topoisomerase 2-alpha (TOP2A)                                  | 1 | 66  | R804  |       |
| 139 | Electron transfer flavoprotein subunit alpha, mitochondrial (ETFA) | 1 | 11  | R169  |       |
| 140 | Elongin B (ELOB)                                                   | 1 | 7   | R24   |       |
| 141 | gamma-Enolase (ENO2)                                               | 1 | 20  | R32   |       |
| 142 | Eukaryotic translation initiation factor 3 subunit F               | 1 | 12  | R108  |       |
| 143 | Fascin (FSCN1)                                                     | 1 | 32  | R208  |       |
| 144 | Filamin-B (FLNB)                                                   | 1 | 81  | R2578 |       |
| 145 | Filamin-C (FLNC)                                                   | 1 | 110 | R2293 |       |
| 146 | Fructose-bisphosphate aldolase A (ALDOA)                           | 1 | 15  | R43   | R43   |
| 147 | Fumarate hydratase, mitochondrial (FH)                             | 1 | 19  | R101  |       |
| 148 | Galectin-1 (LGALS1)                                                | 1 | 5   | R21   |       |
| 149 | Glucose-6-phosphate dehydrogenase (G6PDH)                          | 1 | 32  | R458  |       |
| 150 | Glutamine--tRNA synthetase (QARS)                                  | 1 | 50  | R576  |       |
| 151 | Glutathione S-transferase omega 1 (GSTO1)                          | 1 | 9   | R48   |       |
| 152 | Glycine-tRNA ligase (GARS)                                         | 1 | 43  | R602  | R602  |
| 153 | Heat shock protein beta-1 (HSPB1)                                  | 1 | 16  | R188  | R188  |
| 154 | Heterogeneous nuclear ribonucleoprotein A/B (HNRNPAB)              | 1 | 13  | R195  |       |
| 155 | Heterogeneous nuclear ribonucleoproteins A2/B1 (HNRNPA2B1)         | 1 | 25  | R153  | R153  |
| 156 | Heterogeneous nuclear ribonucleoprotein K (HNRPK)                  | 1 | 36  | R69   |       |
| 157 | Heterogeneous nuclear ribonucleoprotein Q (SYNCRIP)                | 1 | 45  | R343  |       |
| 158 | Heterogeneous nuclear ribonucleoprotein R (HNRPR)                  | 1 | 47  | R308  | R308  |
| 159 | Heat shock 70 kDa protein 4 (HSPA4)                                | 1 | 29  | R234  |       |
| 160 | Insulin-like growth factor 2 mRNA-binding protein 2 (IF2B2)        | 1 | 29  | R576  |       |
| 161 | Interleukin enhancer-binding factor 2 (ILF2)                       | 1 | 23  | R60   | R60   |
| 162 | Interleukin enhancer-binding factor 3 (ILF3)                       | 1 | 38  | R264  |       |
| 163 | Leucine-tRNA ligase, cytoplasmic (LARS)                            | 1 | 49  | R785  |       |
| 164 | Lysine-tRNA ligase (KARS)                                          | 1 | 28  | R314  |       |
| 165 | Malate dehydrogenase, mitochondrial (MDH2)                         | 1 | 10  | R52   |       |
| 166 | S-Methyl-5'-thioadenosine phosphorylase (MTAP)                     | 1 | 19  | R166  |       |
| 167 | Microtubule-associated protein 4, similar (B4DM10_HUMAN)           | 1 | 10  | R583  |       |
| 168 | Multifunctional protein ADE2 (PAICS)                               | 1 | 16  | R255  |       |
| 169 | Myosin-9 (MYH9)                                                    | 1 | 122 | R358  |       |
| 170 | Neutral alpha-glucosidase AB (GANAB)                               | 1 | 66  | R944  |       |
| 171 | Nicotinamide phosphoribosyltransferase (NAMPT)                     | 1 | 14  | R196  |       |
| 172 | Nicotinamide N-methyltransferase (NNMT)                            | 1 | 9   | R30   | R30   |
| 173 | Nucleosome assembly protein 1-like 1 (NAPIL1)                      | 1 | 13  | R104  | R104  |



|     |                                                                           |   |     |       |      |
|-----|---------------------------------------------------------------------------|---|-----|-------|------|
| 174 | Nucleosome assembly protein 1-like 4 (NAPIL4)                             | 1 | 14  | R93   | R93  |
| 175 | Nucleoside diphosphate kinase (NME1-NME2)                                 | 1 | 16  | R113  |      |
| 176 | Nuclear ubiquitous casein and cyclin-dependent kinase substrate 1         | 1 | 14  | R28   | R28  |
| 177 | Peptidyl-prolyl cis-trans isomerase A (PPIA)                              | 1 | 6   | R37   |      |
| 178 | Phosphatase 2A Inhibitor (I2PP2A)                                         | 1 | 10  | R136  |      |
| 179 | 6-Phosphogluconate dehydrogenase, decarboxylating (PGD)                   | 1 | 20  | R382  | R382 |
| 180 | Phosphoglycerate mutase 1 (PGAM1)                                         | 1 | 17  | R90   | R90  |
| 181 | Glycogen phosphorylase (PYGB)                                             | 1 | 53  | R640  | R640 |
| 182 | Phosphoserine aminotransferase (PSAT1)                                    | 1 | 11  | R45   | R45  |
| 183 | Plastin-3 (PLST)                                                          | 1 | 25  | R599  |      |
| 184 | Profilin-1 (PROF1)                                                        | 1 | 5   | R56   |      |
| 185 | Prostaglandin reductase 1 (PTGR1)                                         | 1 | 8   | R56   | R56  |
| 186 | 26S protease regulatory subunit 4 (PSMC1)                                 | 1 | 21  | R249  |      |
| 187 | Proteasome subunit A2 (PSMA2)                                             | 1 | 10  | R220  |      |
| 188 | Proteasome subunit A5 (PSMA5)                                             | 1 | 7   | R53   | R53  |
| 189 | Proteasome subunit B2 (PSMB2)                                             | 1 | 12  | R70   | R70  |
| 190 | Proteasome subunit B3 (PSMB3)                                             | 1 | 12  | R27   |      |
| 191 | Proteasome subunit B4 (PSMB4)                                             | 1 | 18  | R89   |      |
| 192 | Prothymosin alpha protein (PTMA)                                          | 1 | 2   | R89   |      |
| 193 | Purine nucleoside phosphorylase (PNPH)                                    | 1 | 16  | R101  |      |
| 194 | Isoleucine-tRNA ligase, cytoplasmic (IARS)                                | 1 | 57  | R624  |      |
| 195 | Ras-related protein Rab 1A (RAB1A)                                        | 1 | 7   | R51   |      |
| 196 | Ras-related protein Rab 1B (RAB1B)                                        | 1 | 8   | R48   |      |
| 197 | Receptor of activated protein C kinase 1 (RACK1)                          | 1 | 13  | R47   | R47  |
| 198 | Rho GDP-dissociation inhibitor 1 (ARHGD1A)                                | 1 | 9   | R49   |      |
| 199 | Serine/threonine-protein phosphatase PP1-alpha catalytic subunit (PPP1CA) | 1 | 18  | R43   |      |
| 200 | Serine/threonine-protein phosphatase PP1-beta catalytic subunit (PPP1CB)  | 1 | 21  | R42   | R42  |
| 201 | Serine-tRNA ligase, cytoplasmic (SARS)                                    | 1 | 32  | R107  |      |
| 202 | Sialic acid synthetase (NANS)                                             | 1 | 13  | R271  |      |
| 203 | Spectrin beta non-erythrocytic 1 (SPTBN1)                                 | 1 | 152 | R675  |      |
| 204 | Succinyl-CoA:3-ketoacid coenzyme A transferase 1, mitochondrial (OXCT1)   | 1 | 23  | R104  |      |
| 205 | T-complex protein 1 subunit zeta (CCT6A)                                  | 1 | 25  | R28   |      |
| 206 | T-complex protein 1 subunit alpha (TCP1)                                  | 1 | 25  | R526  |      |
| 207 | T-complex protein 1 subunit epsilon (TPCE)                                | 1 | 25  | R49   |      |
| 208 | T-complex protein 1 subunit gamma (TPCG)                                  | 1 | 35  | R518  |      |
| 209 | TIP41-like protein (TIPRL)                                                | 1 | 13  | R200  |      |
| 210 | Transaldolase (TALDO)                                                     | 1 | 14  | R295  |      |
| 211 | Transforming protein RhoA (RHOA)                                          | 1 | 12  | R168  |      |
| 212 | Tropomyosin 1alpha (TPM1)                                                 | 1 | 17  | R133  | R133 |
| 213 | Tubulin beta-4B chain (TUBB4B)                                            | 1 | 21  | R251  |      |
| 214 | Tubulin beta-7 chain (B4DMJ5_HUMAN)                                       | 1 | 10  | R121  |      |
| 215 | Ubiquitin carboxyl-terminal hydrolase (USP14)                             | 1 | 16  | R267  |      |
| 216 | Ubiquitin-like modifier-activating enzyme 1 (UBA1)                        | 1 | 50  | R557  |      |
| 217 | UDP-N-acetylhexosamine pyrophosphorylase (UAP1)                           | 1 | 19  | R399  |      |
| 218 | UTP-glucose-1-phosphate uridylyltransferase 2 (UGP2)                      | 1 | 21  | R301  |      |
| 219 | Vinculin (VINC)                                                           | 1 | 67  | R1107 |      |

220 X-ray repair cross-complementing protein 5 (XRCC5)  
TOTAL: 220

1 26 R141  
TOTAL 411

TOTAL:148 sites; 104 proteins

| Table S4                    |                           | REACTOME Pathways analysis of cytosolic proteins at risk of MG modification. |  | Count | Fold enrichment | Bonferroni | FDR      |
|-----------------------------|---------------------------|------------------------------------------------------------------------------|--|-------|-----------------|------------|----------|
| Reactome term               | Process                   | Reactome pathway                                                             |  |       |                 |            |          |
| R-HSA-390450:R-HSA-390450   | Protein folding           | Folding of actin by CCT/TriC                                                 |  | 8     | 38.6            | 4.53E-08   | 2.13E-07 |
| R-HSA-2408517:R-HSA-2408517 | Protein synthesis         | SeMet incorporation into proteins                                            |  | 7     | 30.7            | 8.45E-06   | 3.97E-05 |
| R-HSA-379716:R-HSA-379716   | Protein synthesis         | Cytosolic tRNA aminoacylation                                                |  | 11    | 22.1            | 4.67E-09   | 2.19E-08 |
| R-HSA-389957:R-HSA-389957   | Protein folding           | Prefoldin mediated transfer of substrate to CCT/TriC                         |  | 11    | 19.0            | 2.91E-08   | 1.37E-07 |
| R-HSA-389960:R-HSA-389960   | Protein folding           | Formation of tubulin folding intermediates by CCT/TriC                       |  | 10    | 17.9            | 5.30E-07   | 2.49E-06 |
| R-HSA-156902:R-HSA-156902   | Protein synthesis         | Peptide chain elongation                                                     |  | 32    | 17.0            | 8.00E-28   | 3.76E-27 |
| R-HSA-192823:R-HSA-192823   | Disease                   | Viral mRNA Translation                                                       |  | 31    | 16.4            | 2.29E-26   | 1.07E-25 |
| R-HSA-2408557:R-HSA-2408557 | Metabolism of amino acids | Selenocysteine synthesis                                                     |  | 32    | 16.4            | 2.56E-27   | 1.20E-26 |
| R-HSA-72764:R-HSA-72764     | Protein synthesis         | Eukaryotic Translation Termination                                           |  | 31    | 15.8            | 1.00E-25   | 4.70E-25 |
| R-HSA-975956:R-HSA-975956   | Protein synthesis         | Nonsense Mediated Decay (NMD) independent of the Exon Juncti                 |  | 31    | 15.4            | 2.04E-25   | 9.56E-25 |
| R-HSA-70171:R-HSA-70171     | Glucose metabolism        | Glycolysis                                                                   |  | 10    | 15.1            | 2.90E-06   | 1.36E-05 |
| R-HSA-70263:R-HSA-70263     | Glucose metabolism        | Gluconeogenesis                                                              |  | 10    | 15.1            | 2.90E-06   | 1.36E-05 |
| R-HSA-72689:R-HSA-72689     | Protein synthesis         | Formation of a pool of free 40S subunits                                     |  | 32    | 14.9            | 9.04E-26   | 4.24E-25 |
| R-HSA-5625740:R-HSA-5625740 | Signal transduction       | RHO GTPases activate PKNs                                                    |  | 8     | 13.8            | 3.26E-04   | 0.00153  |
| R-HSA-156827:R-HSA-156827   | Protein synthesis         | L13a-mediated translational silencing of Ceruloplasmin expressior            |  | 32    | 13.5            | 2.12E-24   | 9.96E-24 |
| R-HSA-72706:R-HSA-72706     | Protein synthesis         | GTP hydrolysis and joining of the 60S ribosomal subunit                      |  | 32    | 13.4            | 2.85E-24   | 1.34E-23 |
| R-HSA-1799339:R-HSA-1799339 | Protein synthesis         | SRP-dependent cotranslational protein targeting to membrane                  |  | 31    | 13.1            | 4.39E-23   | 2.06E-22 |
| R-HSA-975957:R-HSA-975957   | Protein synthesis         | Nonsense Mediated Decay (NMD) enhanced by the Exon Junctionor                |  | 31    | 13.0            | 5.84E-23   | 2.74E-22 |
| R-HSA-72695:R-HSA-72695     | Protein synthesis         | Formation of the ternary complex, and subsequently, the 43S com              |  | 14    | 12.5            | 1.19E-08   | 5.58E-08 |
| R-HSA-72702:R-HSA-72702     | Protein synthesis         | Ribosomal scanning and start codon recognition                               |  | 14    | 11.1            | 6.21E-08   | 2.91E-07 |
| R-HSA-72649:R-HSA-72649     | Protein synthesis         | Translation initiation complex formation                                     |  | 14    | 11.1            | 6.21E-08   | 2.91E-07 |
| R-HSA-445355:R-HSA-445355   | Muscle contraction        | Smooth Muscle Contraction                                                    |  | 8     | 11.0            | 0.0016393  | 0.0077   |
| R-HSA-5663213:R-HSA-5663213 | Signal transduction       | RHO GTPases Activate WASPs and WAVES                                         |  | 8     | 10.7            | 0.0019995  | 0.00939  |
| R-HSA-3928662:R-HSA-3928662 | Signal transduction       | EPHB-mediated forward signaling                                              |  | 9     | 10.3            | 5.11E-04   | 0.0024   |
| R-HSA-450408:R-HSA-450408   | Metabolism of RNA         | AUF1 (hnRNP D0) binds and destabilizes mRNA                                  |  | 11    | 9.5             | 4.79E-05   | 2.25E-04 |
| R-HSA-5358346:R-HSA-5358346 | Signal transduction       | Hedgehog ligand biogenesis                                                   |  | 11    | 8.8             | 9.44E-05   | 4.43E-04 |
| R-HSA-211733:R-HSA-211733   | Programmed cell death     | Regulation of activated PAK-2p34 by proteasome mediated degra                |  | 9     | 8.7             | 0.0020186  | 0.00948  |
| R-HSA-1236978:R-HSA-1236978 | Immune system             | Cross-presentation of soluble exogenous antigens (endosomes)                 |  | 9     | 8.7             | 0.0020186  | 0.00948  |
| R-HSA-5362768:R-HSA-5362768 | Disease                   | Hh mutants that don't undergo autocatalytic processing are degra             |  | 10    | 8.6             | 5.12E-04   | 0.0024   |
| R-HSA-69481:R-HSA-69481     | Cell cycle                | G2/M Checkpoints                                                             |  | 9     | 8.5             | 0.0023519  | 0.01105  |
| R-HSA-350562:R-HSA-350562   | Metabolims of polyamines  | Regulation of ornithine decarboxylase (ODC)                                  |  | 9     | 8.5             | 0.0023519  | 0.01105  |
| R-HSA-69229:R-HSA-69229     | Cell cycle                | Ubiquitin-dependent degradation of Cyclin D1                                 |  | 9     | 8.5             | 0.0023519  | 0.01105  |
| R-HSA-69017:R-HSA-69017     | Cell cycle                | CDK-mediated phosphorylation and removal of Cdc6                             |  | 9     | 8.5             | 0.0023519  | 0.01105  |
| R-HSA-180534:R-HSA-180534   | Disease                   | Vpu mediated degradation of CD4                                              |  | 9     | 8.4             | 0.0027306  | 0.01283  |
| R-HSA-349425:R-HSA-349425   | Cell cycle                | Autodegradation of the E3 ubiquitin ligase COP1                              |  | 9     | 8.4             | 0.0027306  | 0.01283  |
| R-HSA-69601:R-HSA-69601     | Cell cycle                | Ubiquitin Mediated Degradation of Phosphorylated Cdc25A                      |  | 9     | 8.2             | 0.0031592  | 0.01485  |
| R-HSA-180585:R-HSA-180585   | Disease                   | Vif-mediated degradation of APOBEC3G                                         |  | 9     | 8.0             | 0.0036431  | 0.01713  |
| R-HSA-5678895:R-HSA-5678895 | Disease                   | Defective CFTR causes cystic fibrosis                                        |  | 10    | 7.9             | 0.001072   | 0.00503  |
| R-HSA-4641257:R-HSA-4641257 | Proteolysis               | Degradation of AXIN                                                          |  | 9     | 7.9             | 0.0041878  | 0.0197   |

|                             |                     |                                                   |    |     |           |         |
|-----------------------------|---------------------|---------------------------------------------------|----|-----|-----------|---------|
| R-HSA-174113:R-HSA-174113   | Proteolysis         | SCF-beta-TrCP mediated degradation of Emi1        | 9  | 7.9 | 0.0041878 | 0.0197  |
| R-HSA-4641258:R-HSA-4641258 | Proteolysis         | Degradation of DVL                                | 9  | 7.6 | 0.0054834 | 0.02581 |
| R-HSA-68827:R-HSA-68827     | DNA replication     | CDT1 association with the CDC6:ORC:origin complex | 9  | 7.4 | 0.0070986 | 0.03343 |
| R-HSA-5676590:R-HSA-5676590 | Signal transduction | NIK-->noncanonical NF-kB signaling                | 9  | 7.4 | 0.0070986 | 0.03343 |
| R-HSA-5610783:R-HSA-5610783 | Proteolysis         | Degradation of GLI2 by the proteasome             | 9  | 7.2 | 0.0080442 | 0.0379  |
| R-HSA-187577:R-HSA-187577   | Proteolysis         | SCF(Skp2)-mediated degradation of p27/p21         | 9  | 7.2 | 0.0080442 | 0.0379  |
| R-HSA-5610780:R-HSA-5610780 | Proteolysis         | Degradation of GLI1 by the proteasome             | 9  | 7.2 | 0.0080442 | 0.0379  |
| R-HSA-5607761:R-HSA-5607761 | Signal transduction | Dectin-1 mediated noncanonical NF-kB signaling    | 9  | 7.2 | 0.0080442 | 0.0379  |
| R-HSA-5610785:R-HSA-5610785 | Proteolysis         | GLI3 is processed to GLI3R by the proteasome      | 9  | 7.2 | 0.0080442 | 0.0379  |
| R-HSA-1236974:R-HSA-1236974 | Immune system       | ER-Phagosome pathway                              | 11 | 6.3 | 0.0022507 | 0.01058 |

Table S5 Real Time PCR primers

| Gene | Forward                 | Reverse                 |
|------|-------------------------|-------------------------|
| HK1  | CTGCTGGTGAAAATCCGTAGTGG | GTCCAAGAAGTCAGAGATGCAGG |
| HK2  | TCCACTCCTCTCAGCATTGG    | CTTGCCCCATTATCCCATGC    |
| GLO1 | ATGCGACCCAGAGTTACCAC    | CCAGGCCTTTCATTTTACCA    |
| ACTB | GGACTTCGAGCAAGAGATGG    | AGCACTGTGTTGGCGTACA     |

**Gel immunoblotting originals.**

Fig. 2h (Glo1 protein and  $\beta$ -actin reference) and Fig. 2m (Glo1 protein band used for normalisation of ubiquitinated Glo1).

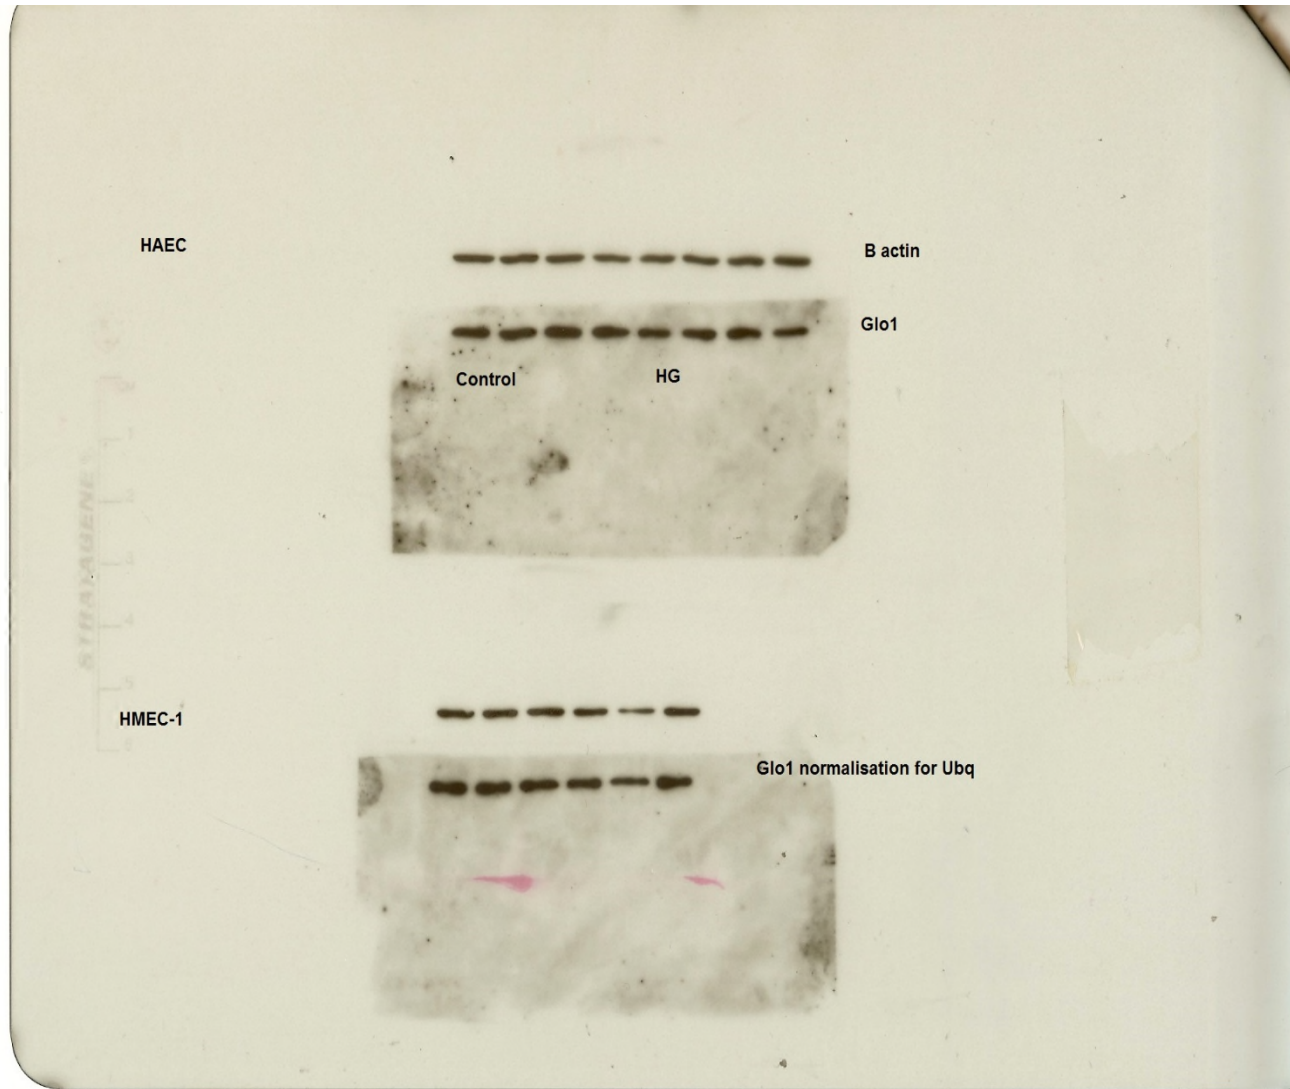

Fig. 2k (Glo1 protein and  $\beta$ -actin reference)

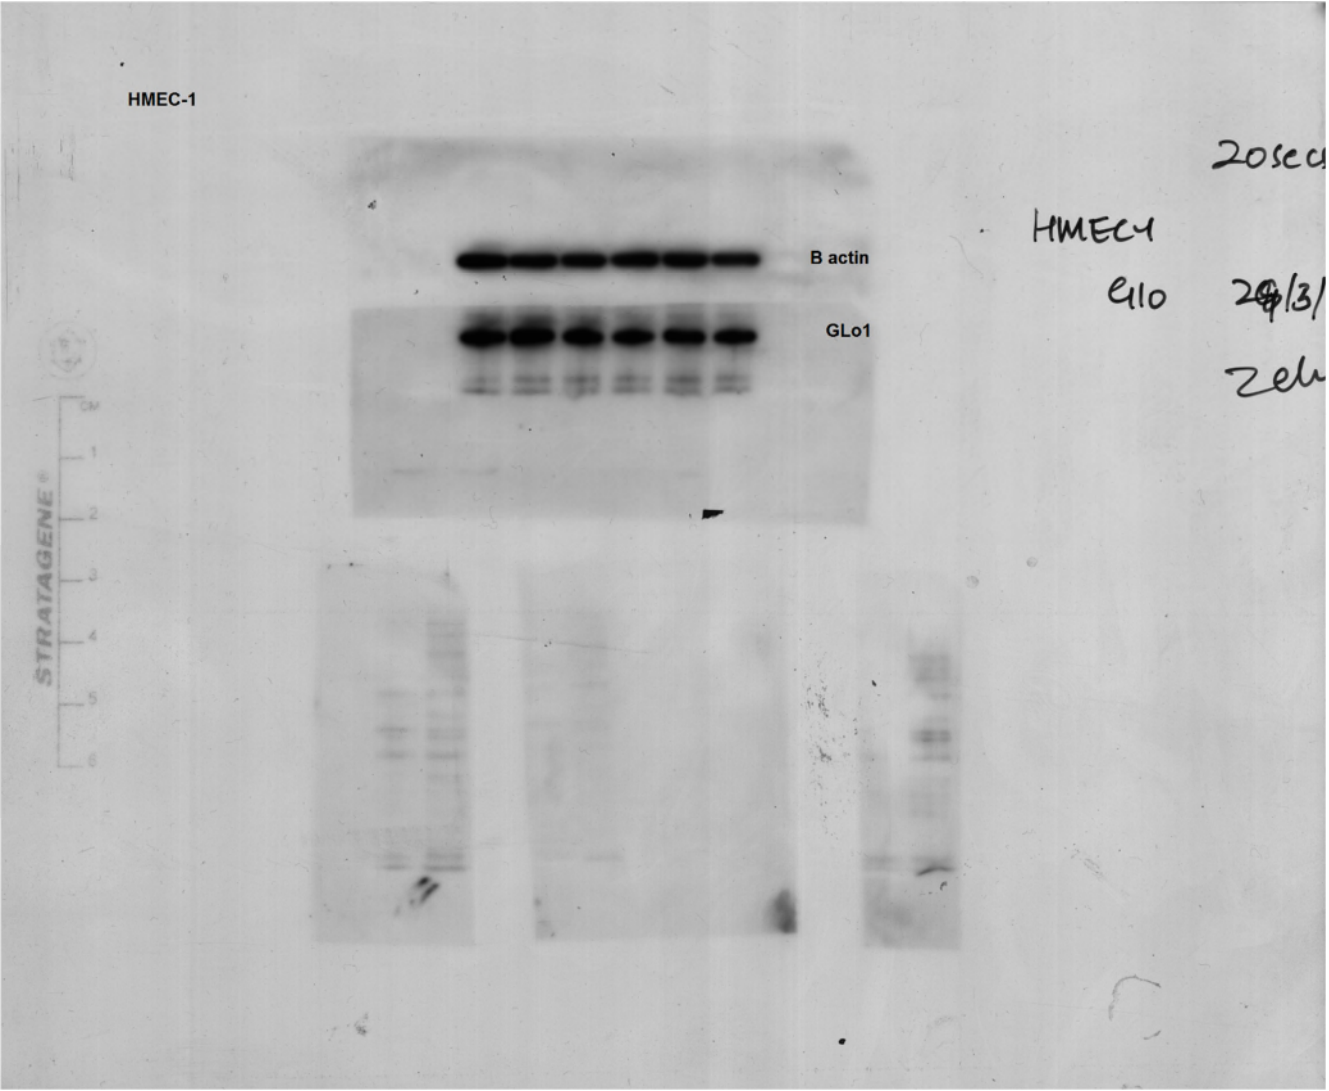

Fig. 2m (Ubiquitinated Glo1 protein band)

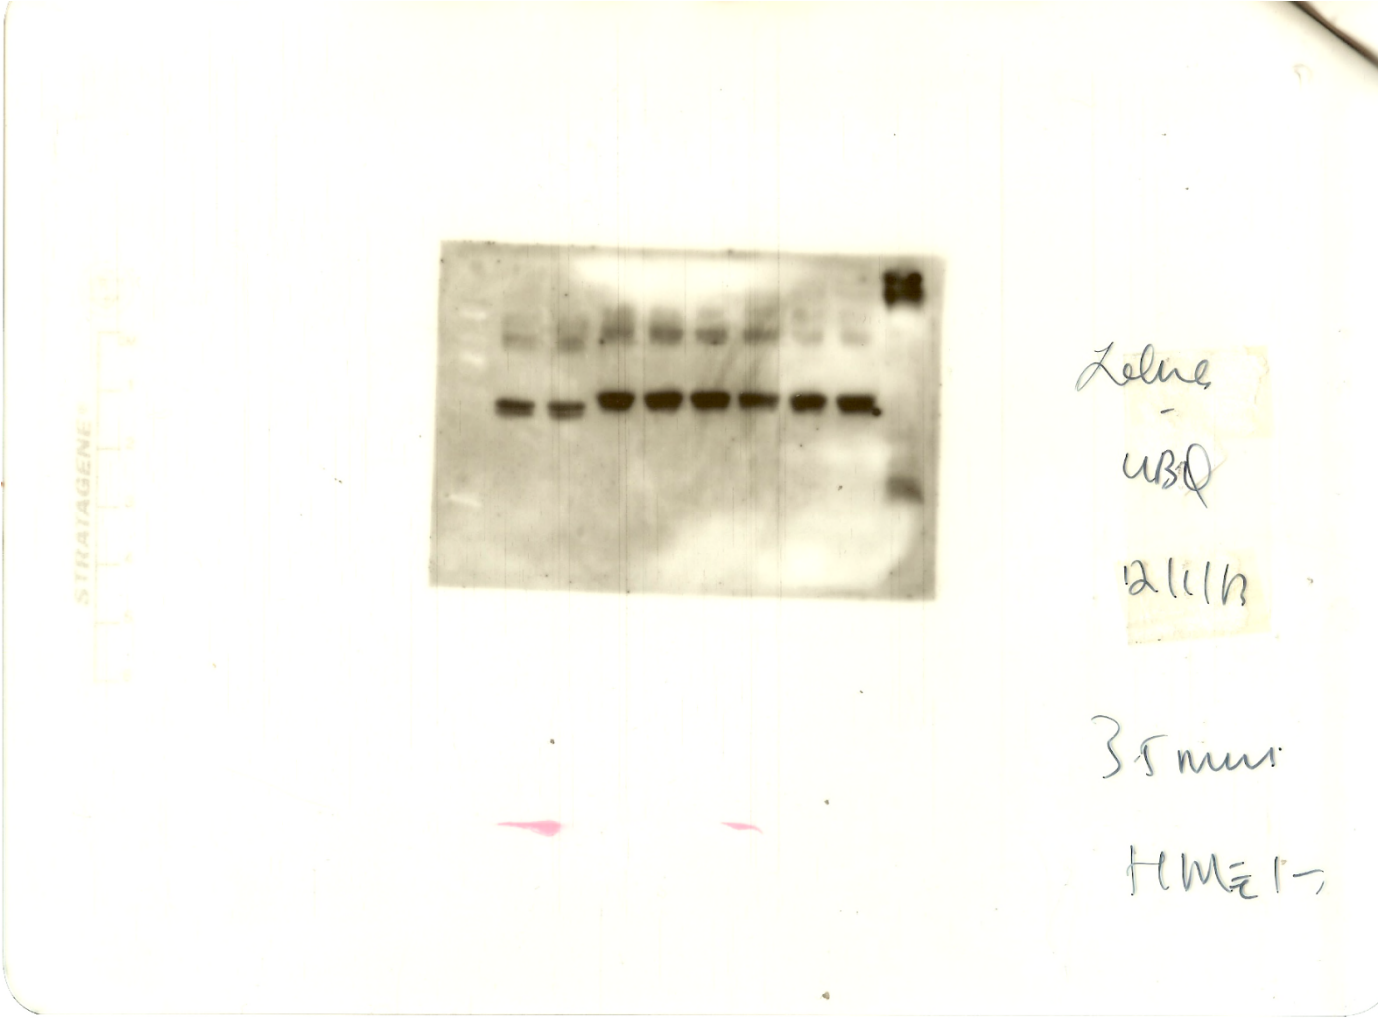



Fig. 3a. HSP70 – 3 days and 6 days, low and high glucose

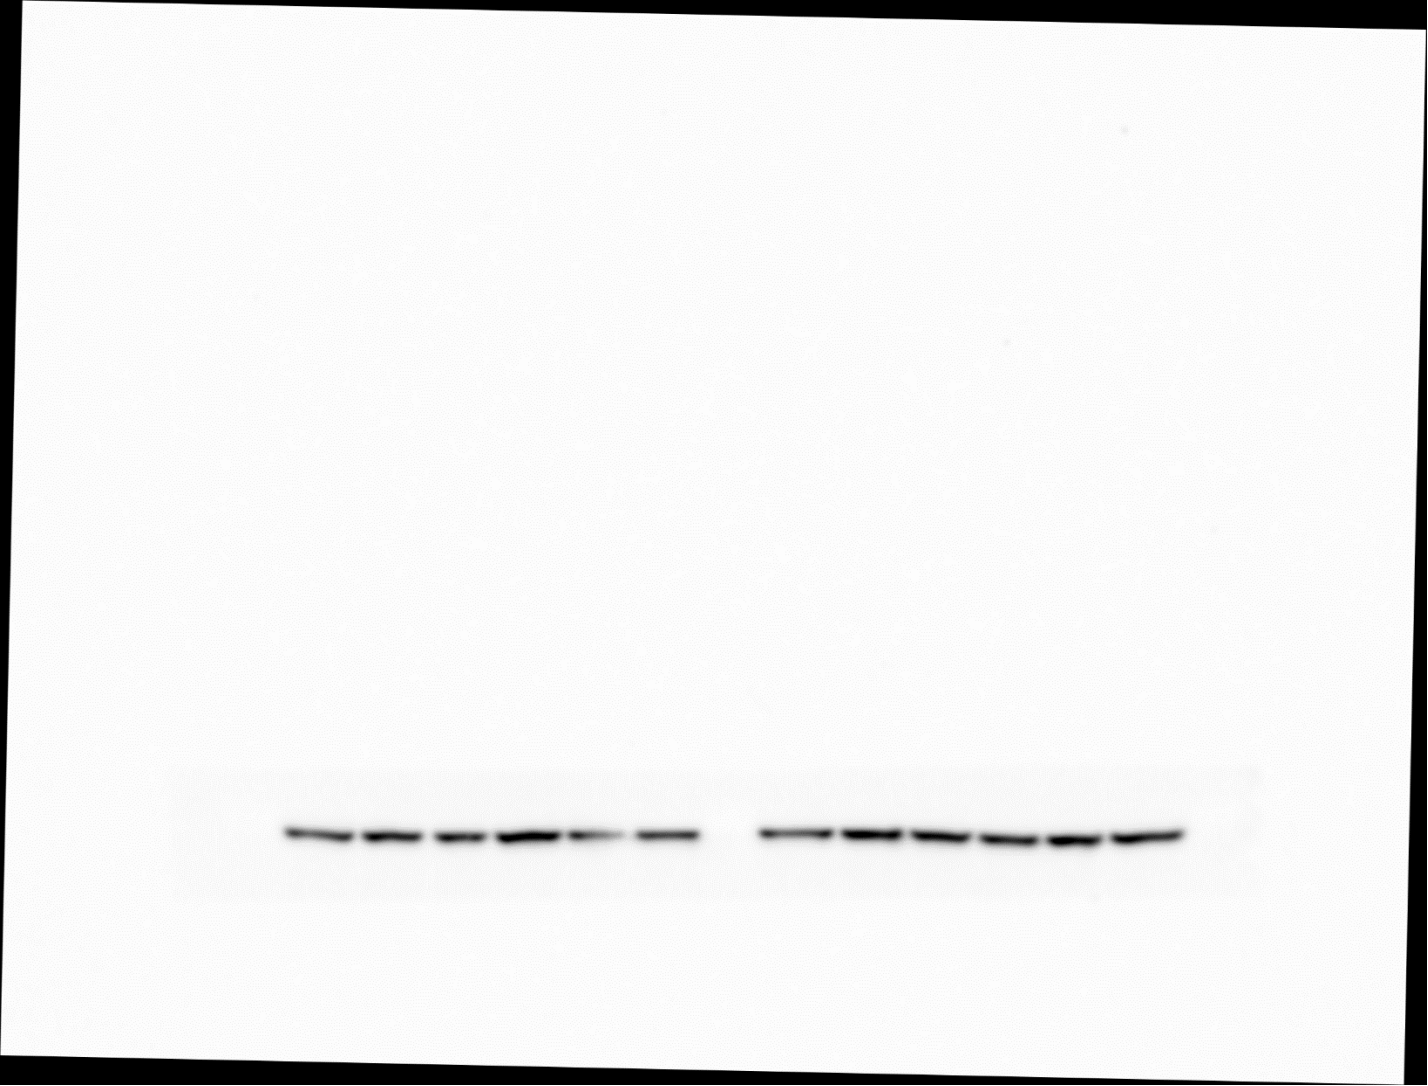

Fig. 3a. GRP78 – 3 days and 6 days, low and high glucose

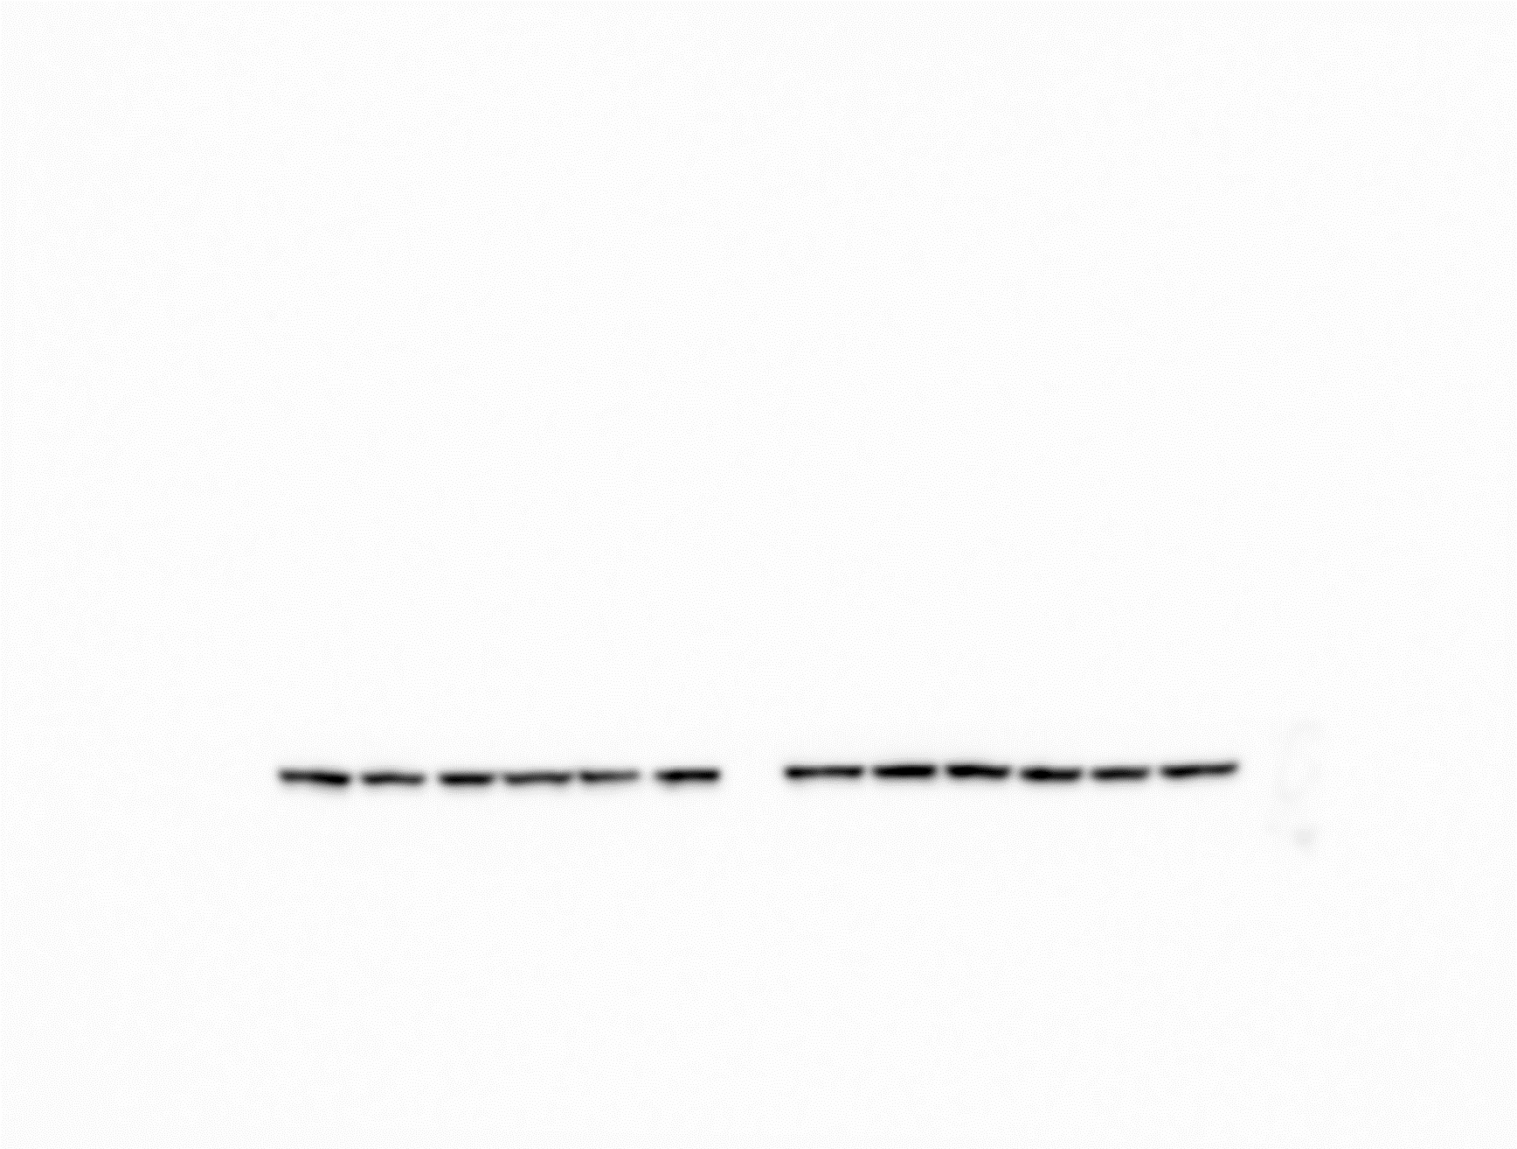

Fig. 3a.  $\beta$ -Actin reference band – 3 days and 6 days, low and high glucose

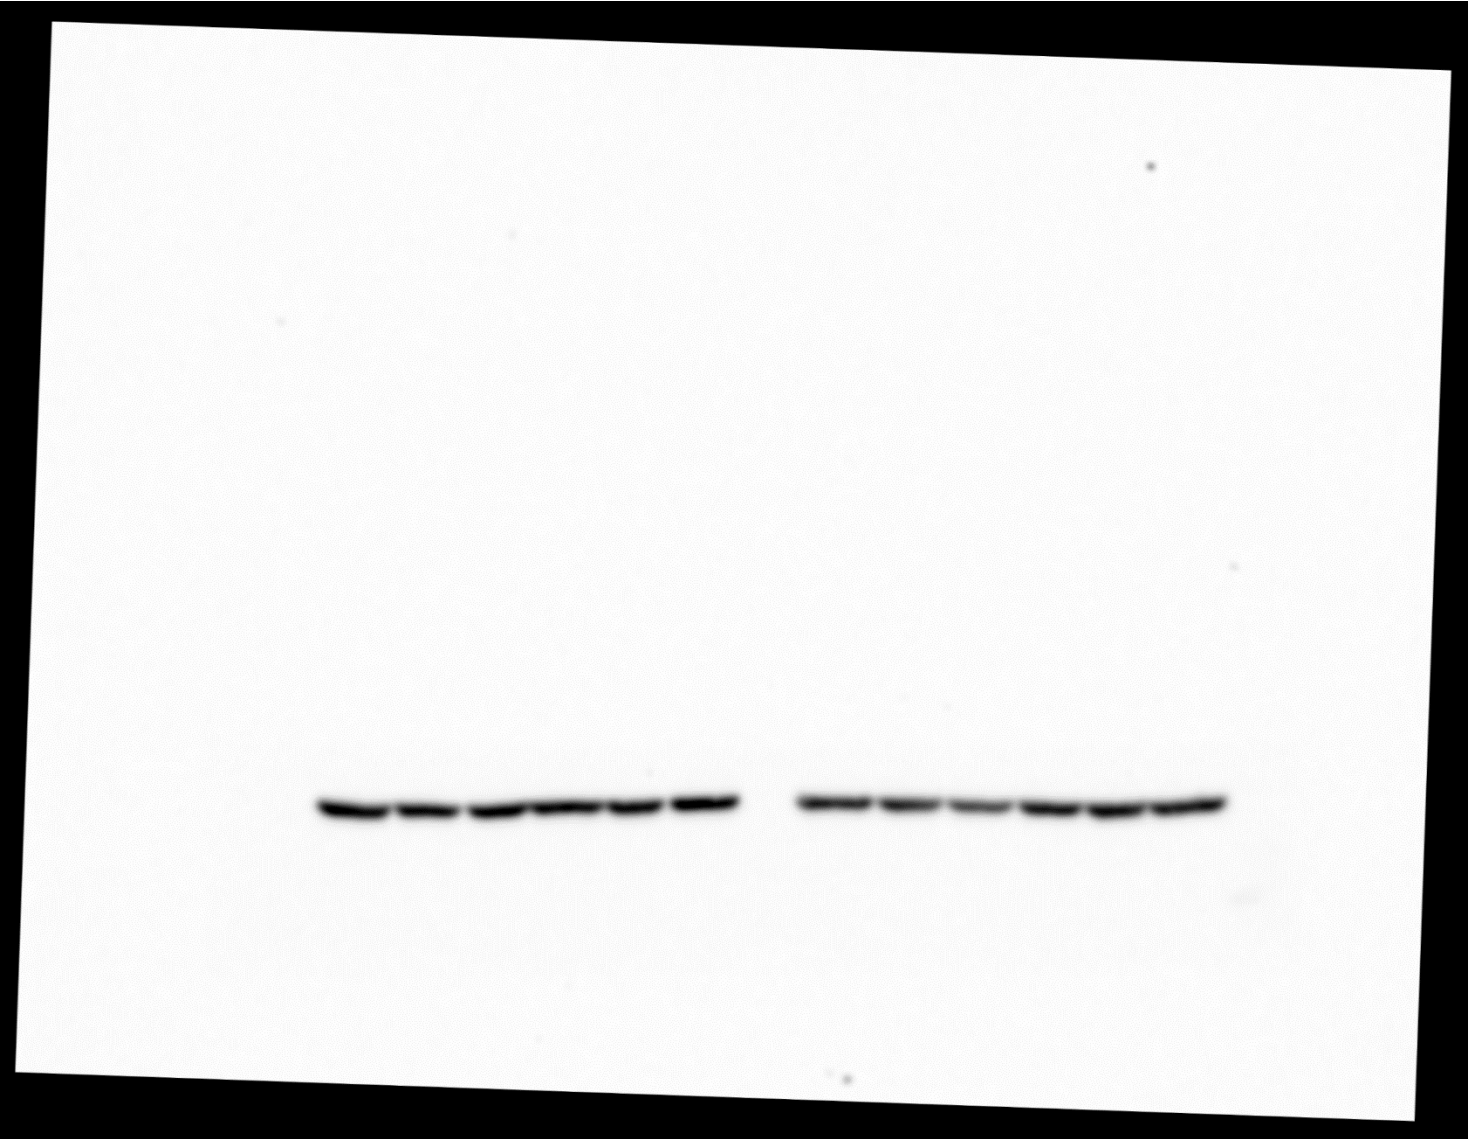

Fig. 3d. Immunoblotting for Glo1. Top gel is used in the manuscript.

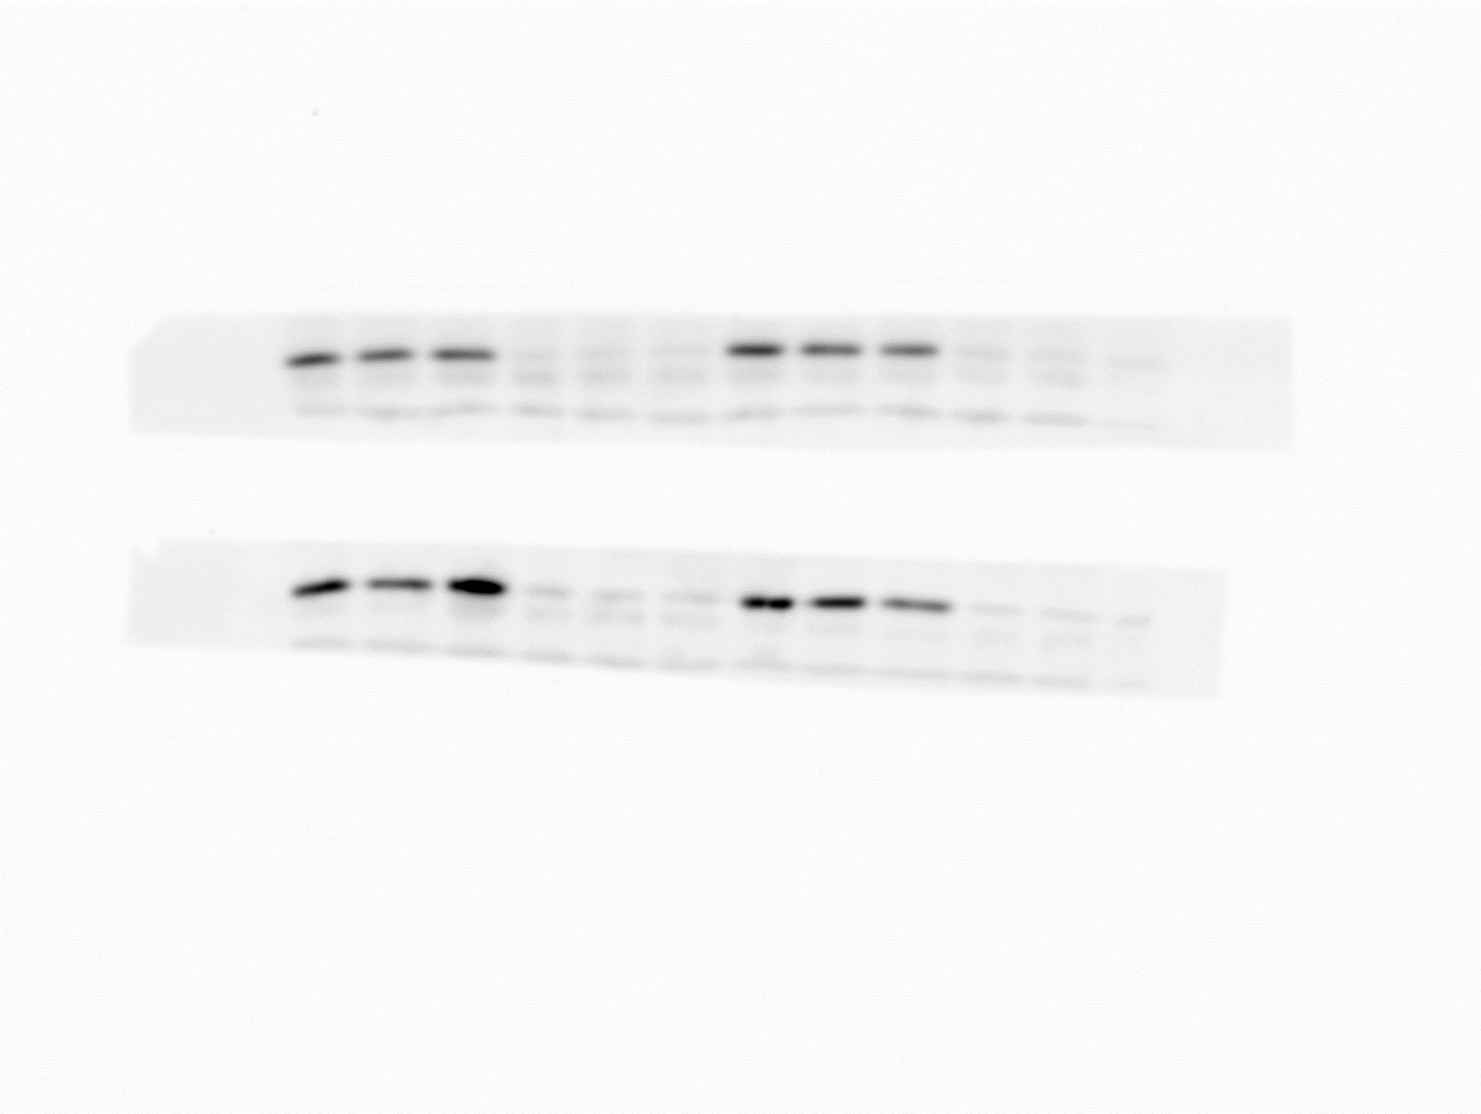

Fig. 3d. Immunoblotting for HSP70.

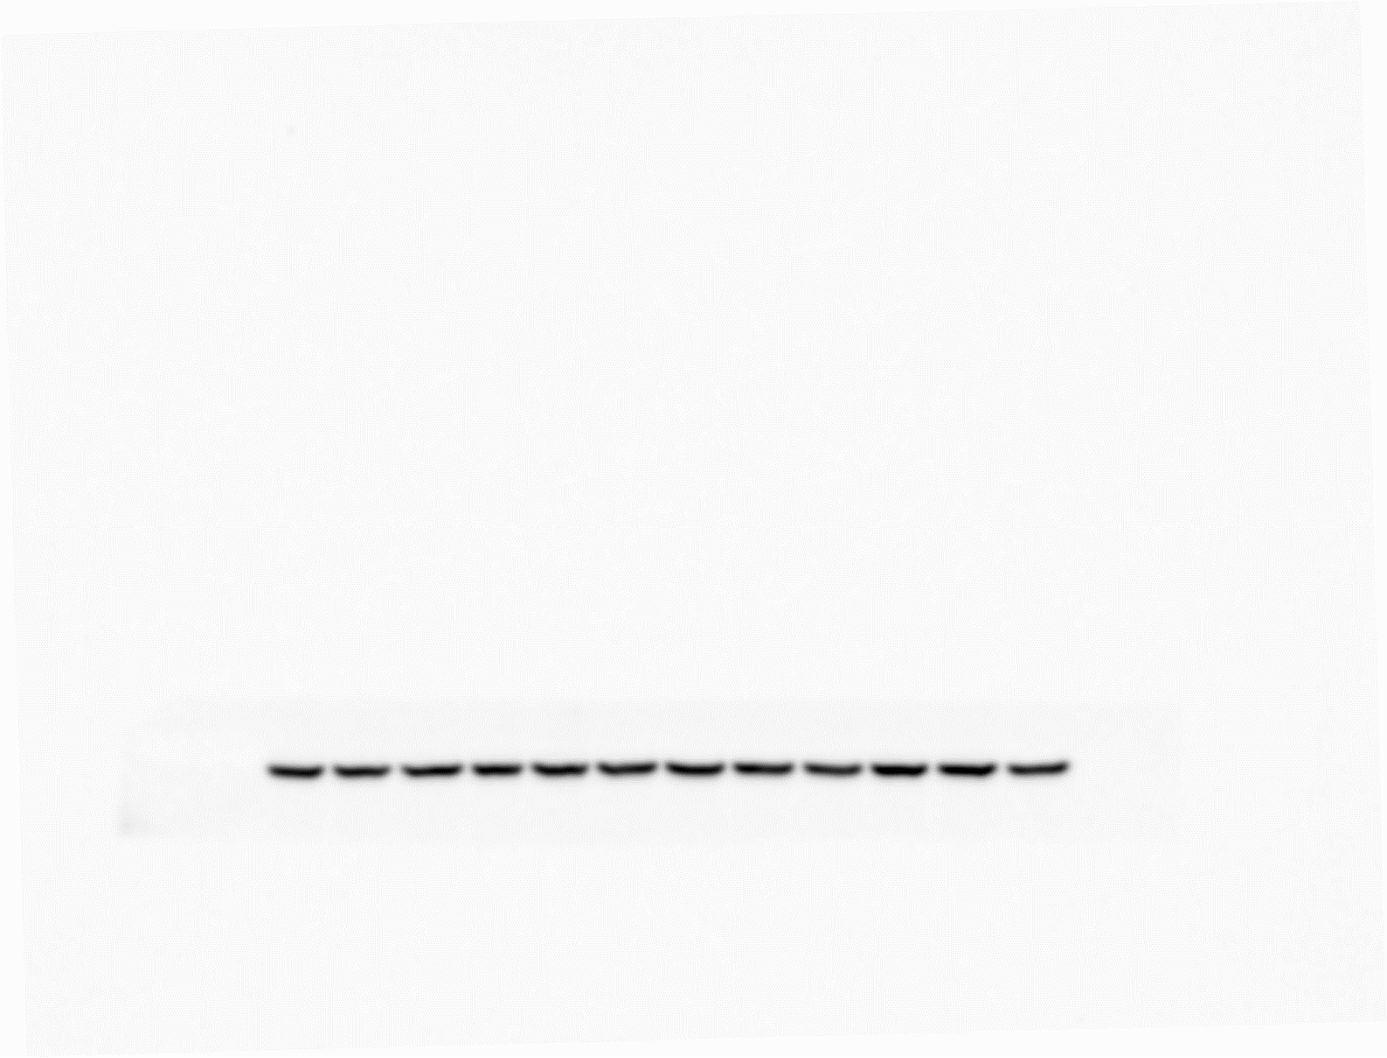

Fig. 3d. Immunoblotting for GRP78.

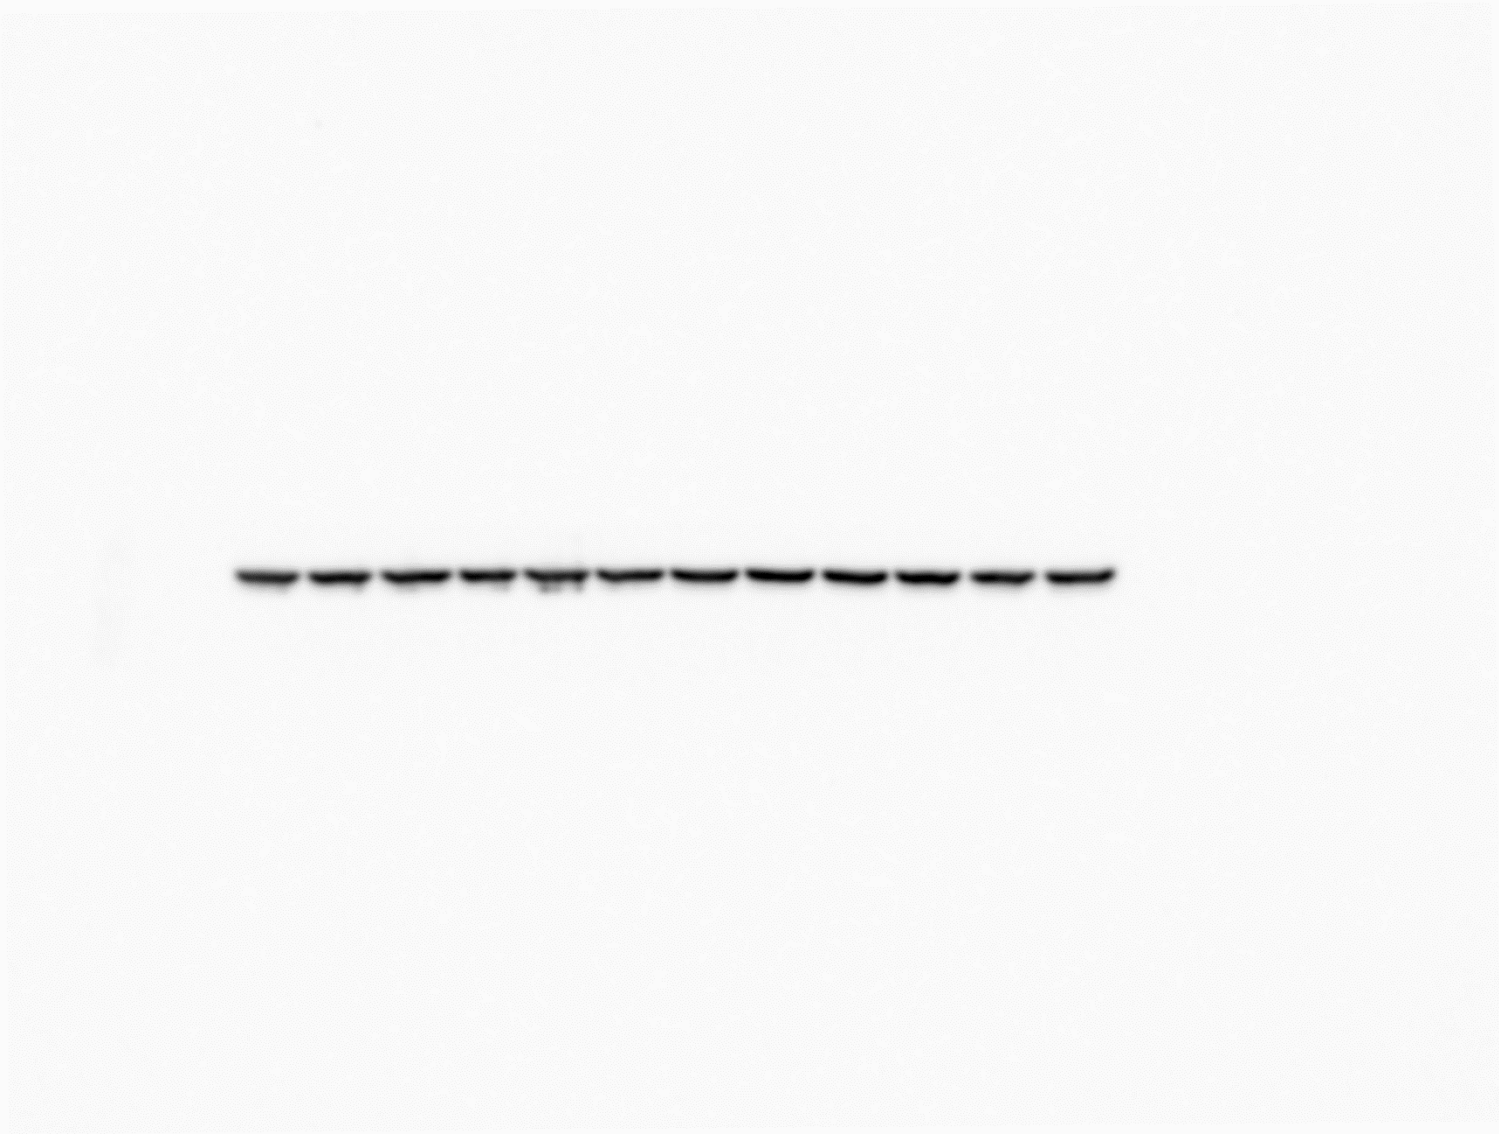

Fig. 3d. Immunoblotting for  $\beta$ -actin reference.

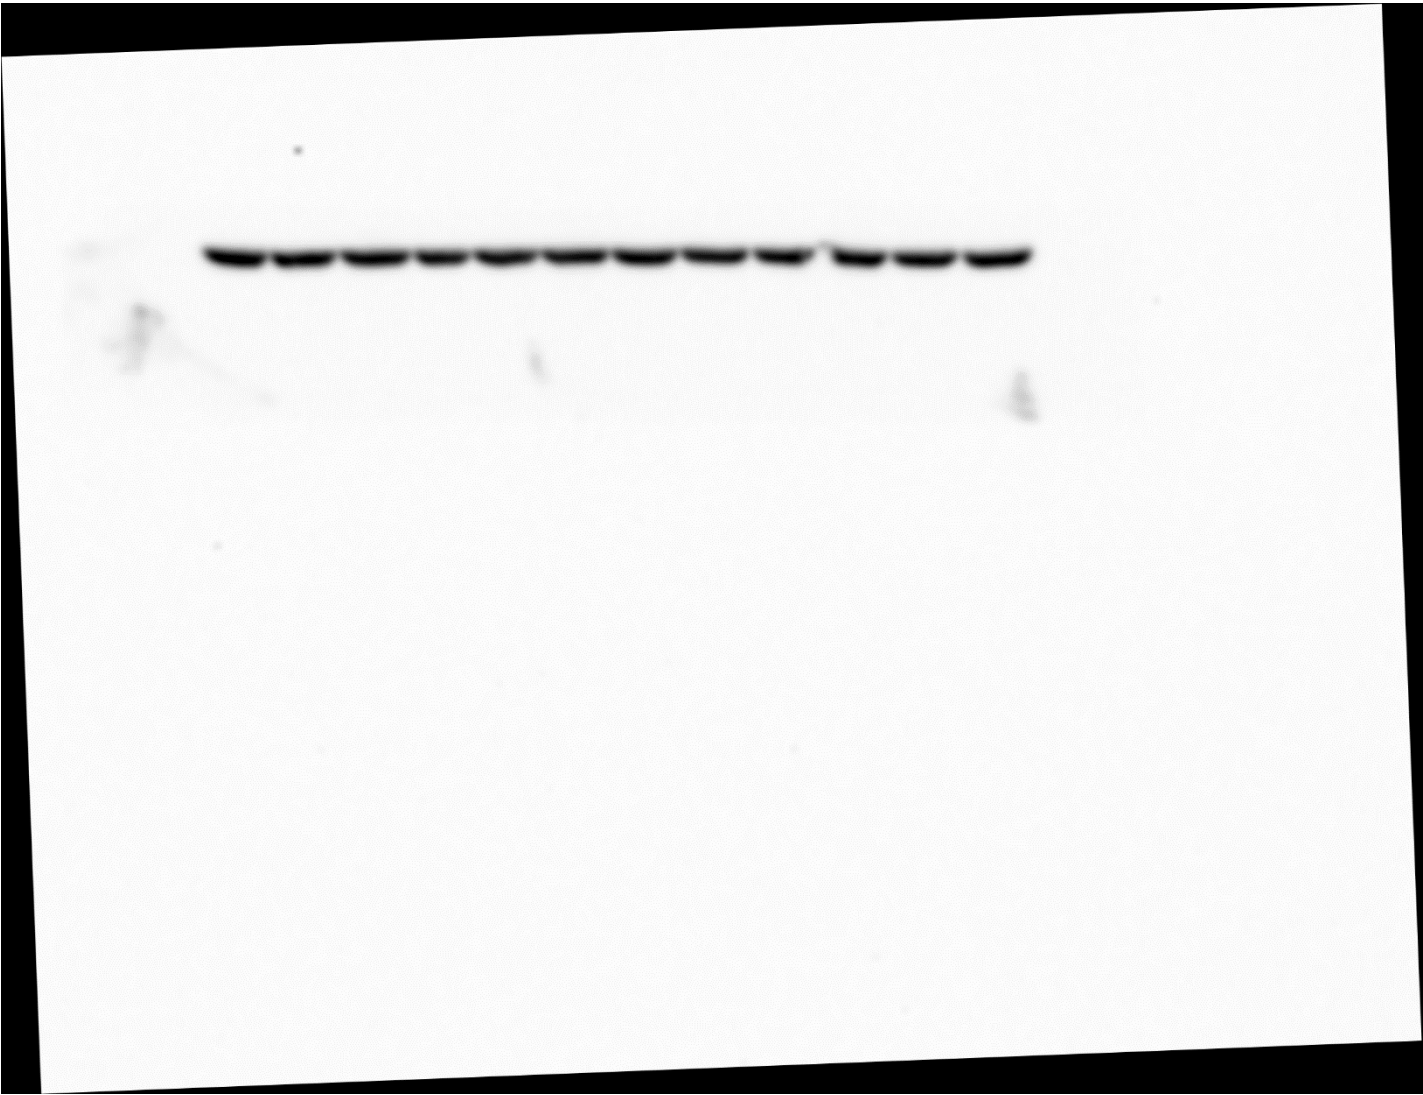

Fig. 5b. HK-2 – 3 days and 6 days, low and high glucose [bottom membrane & band]. ( $\beta$ -Actin reference band is given above – same as for Fig. 3a)

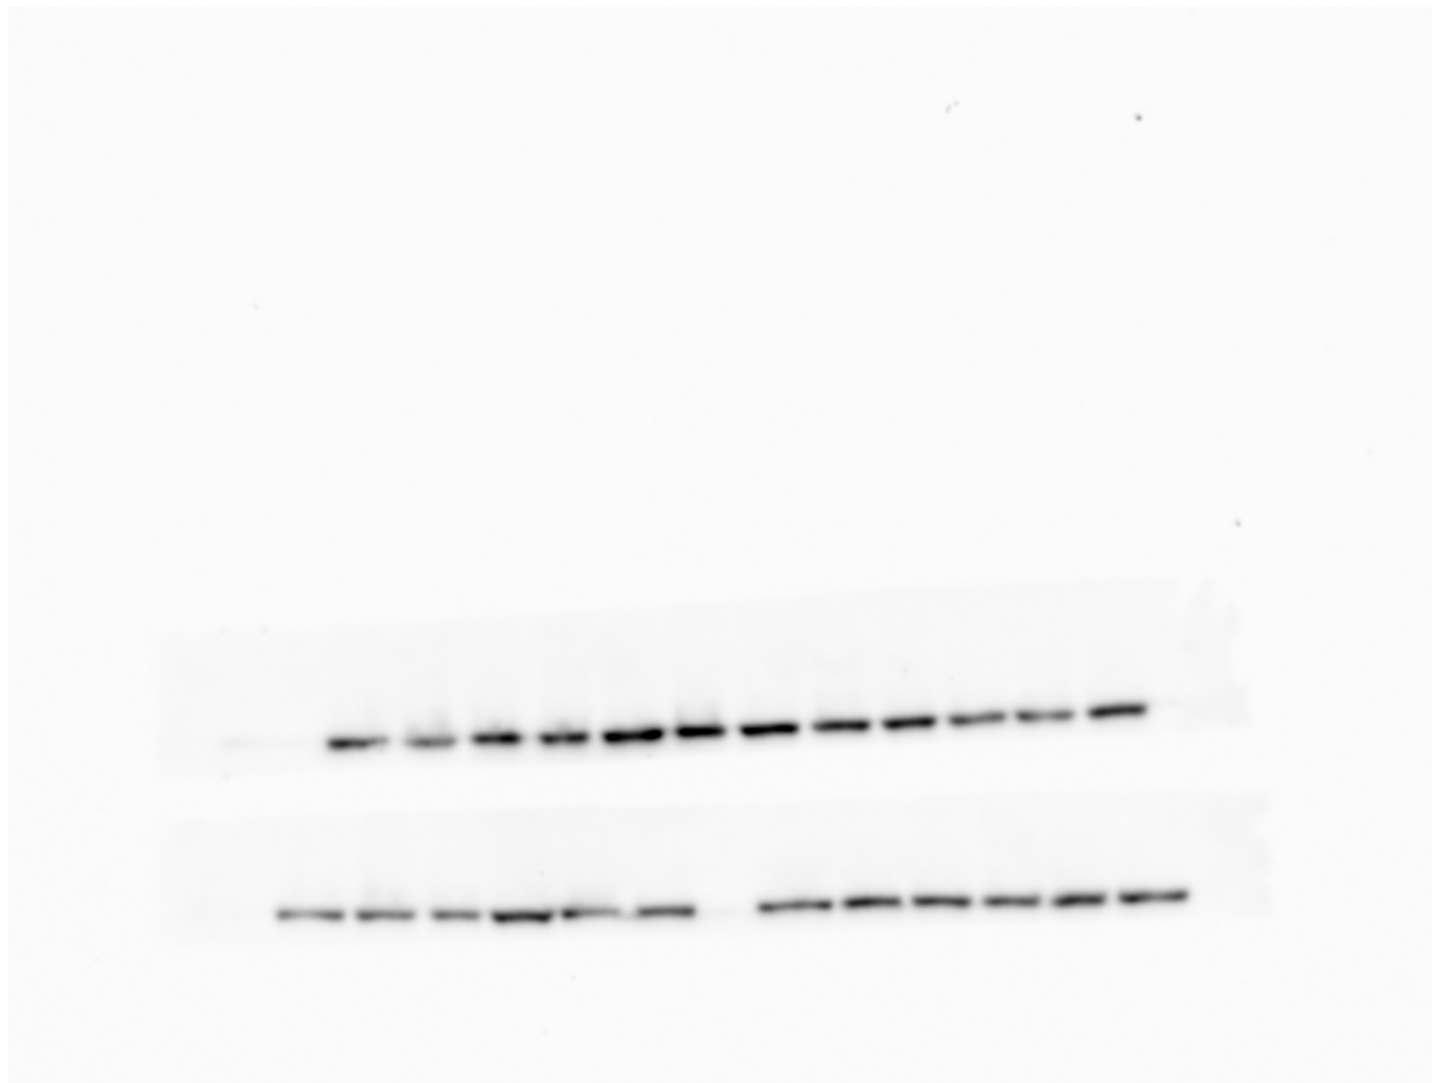



Fig. 5f. HK-2 knockdown study. HK-2 antibody immunoblotting (top) and  $\beta$ -Actin reference (bottom).

**HK-2 Original gel:**

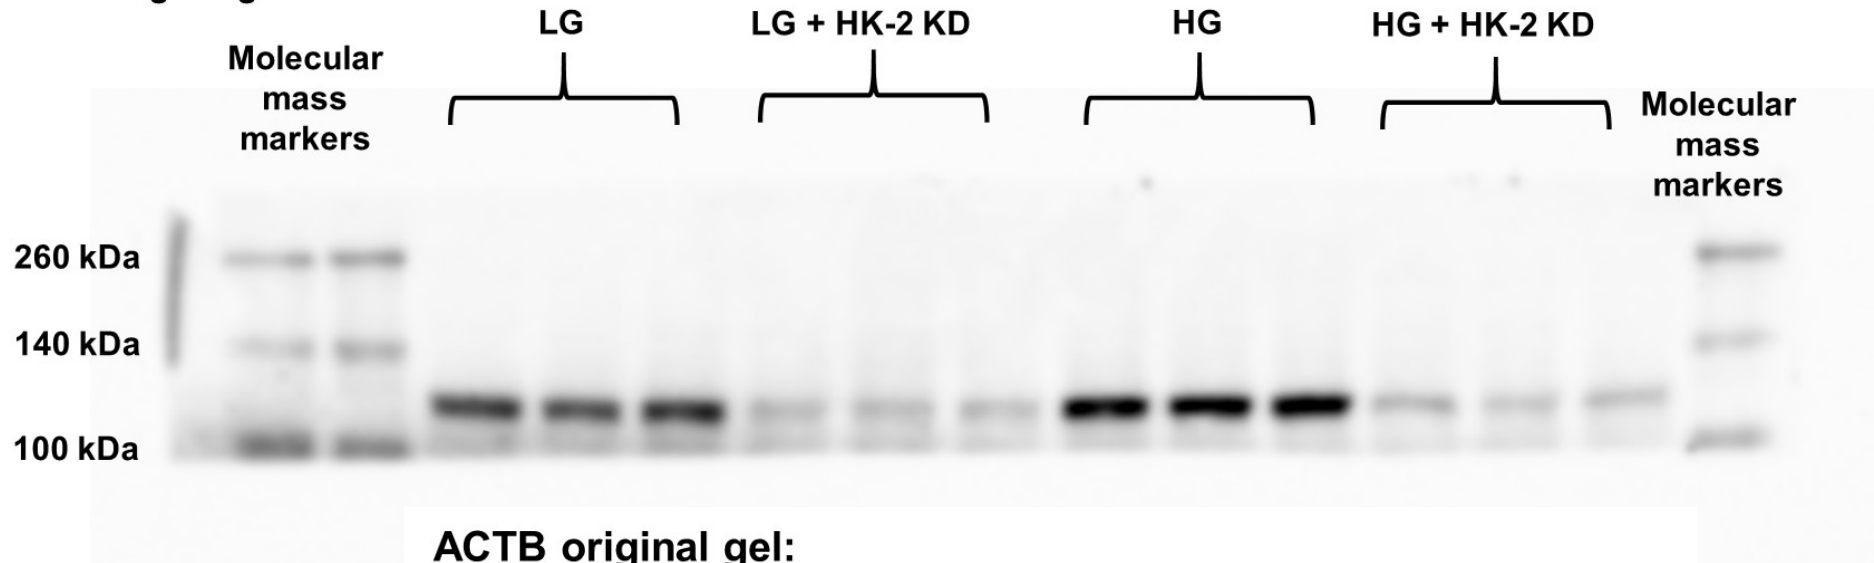

**ACTB original gel:**

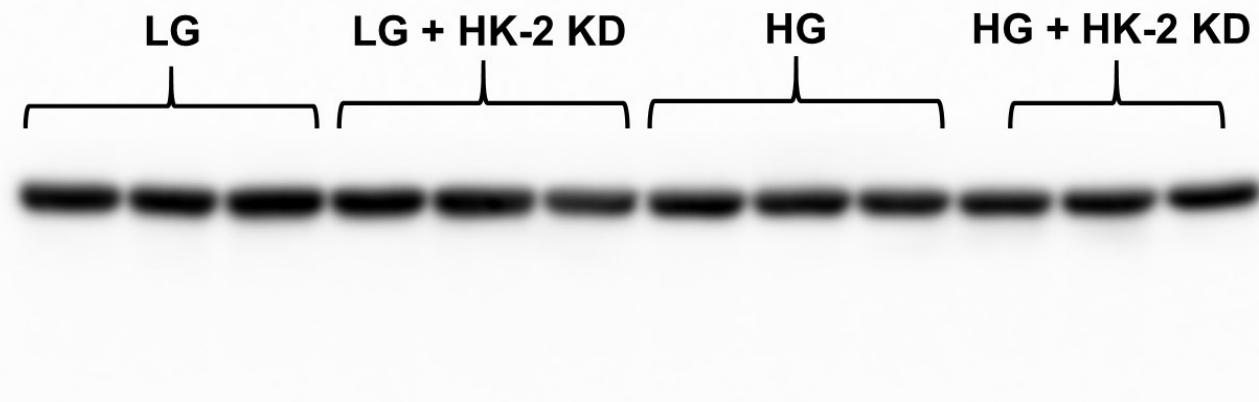

Fig. 6e. Immunoblotting for G6PD.

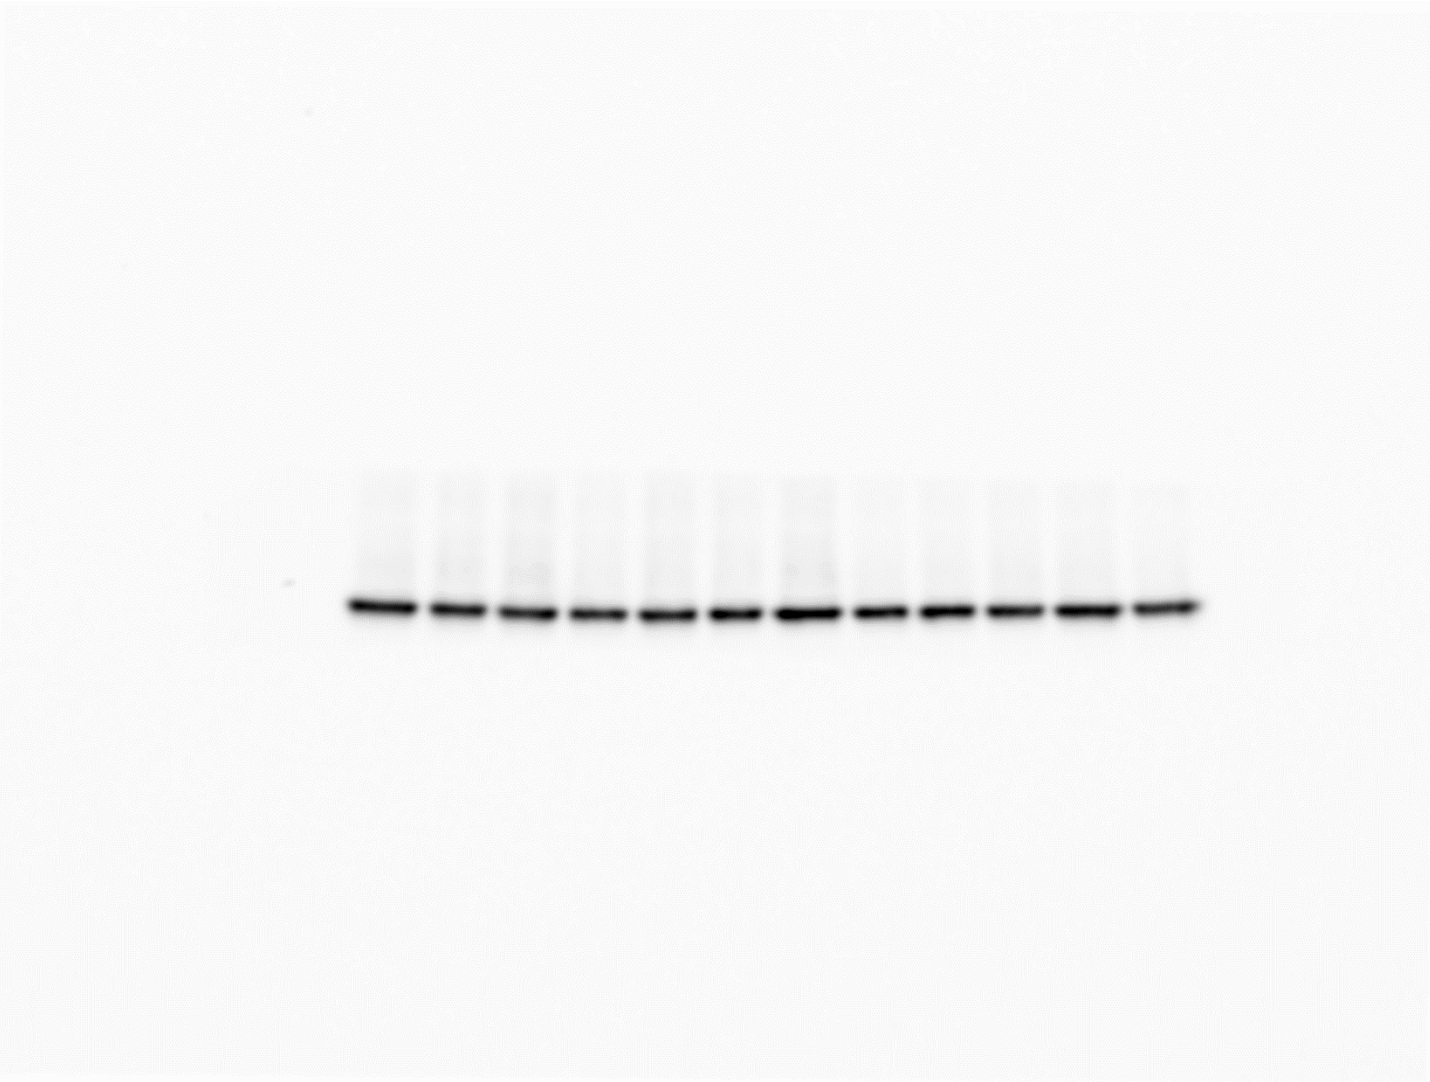

Fig. 6e. Immunoblotting for G6PD:  $\beta$ -actin reference.

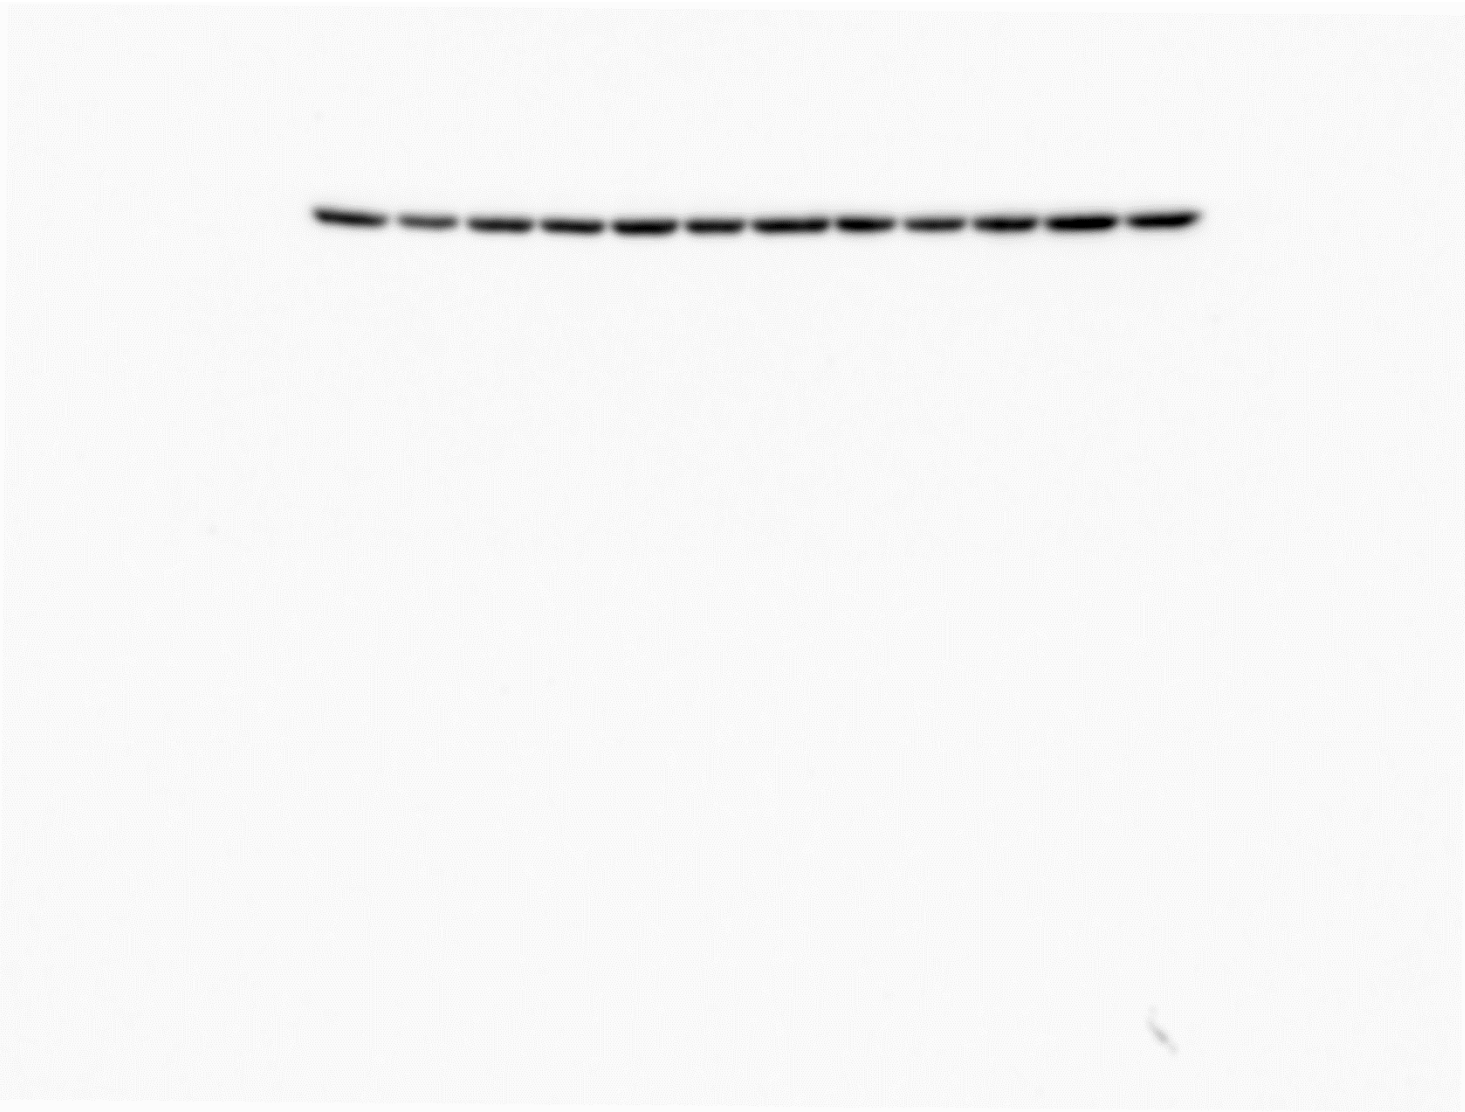

Fig. 6f. Immunoblotting for HK-2.

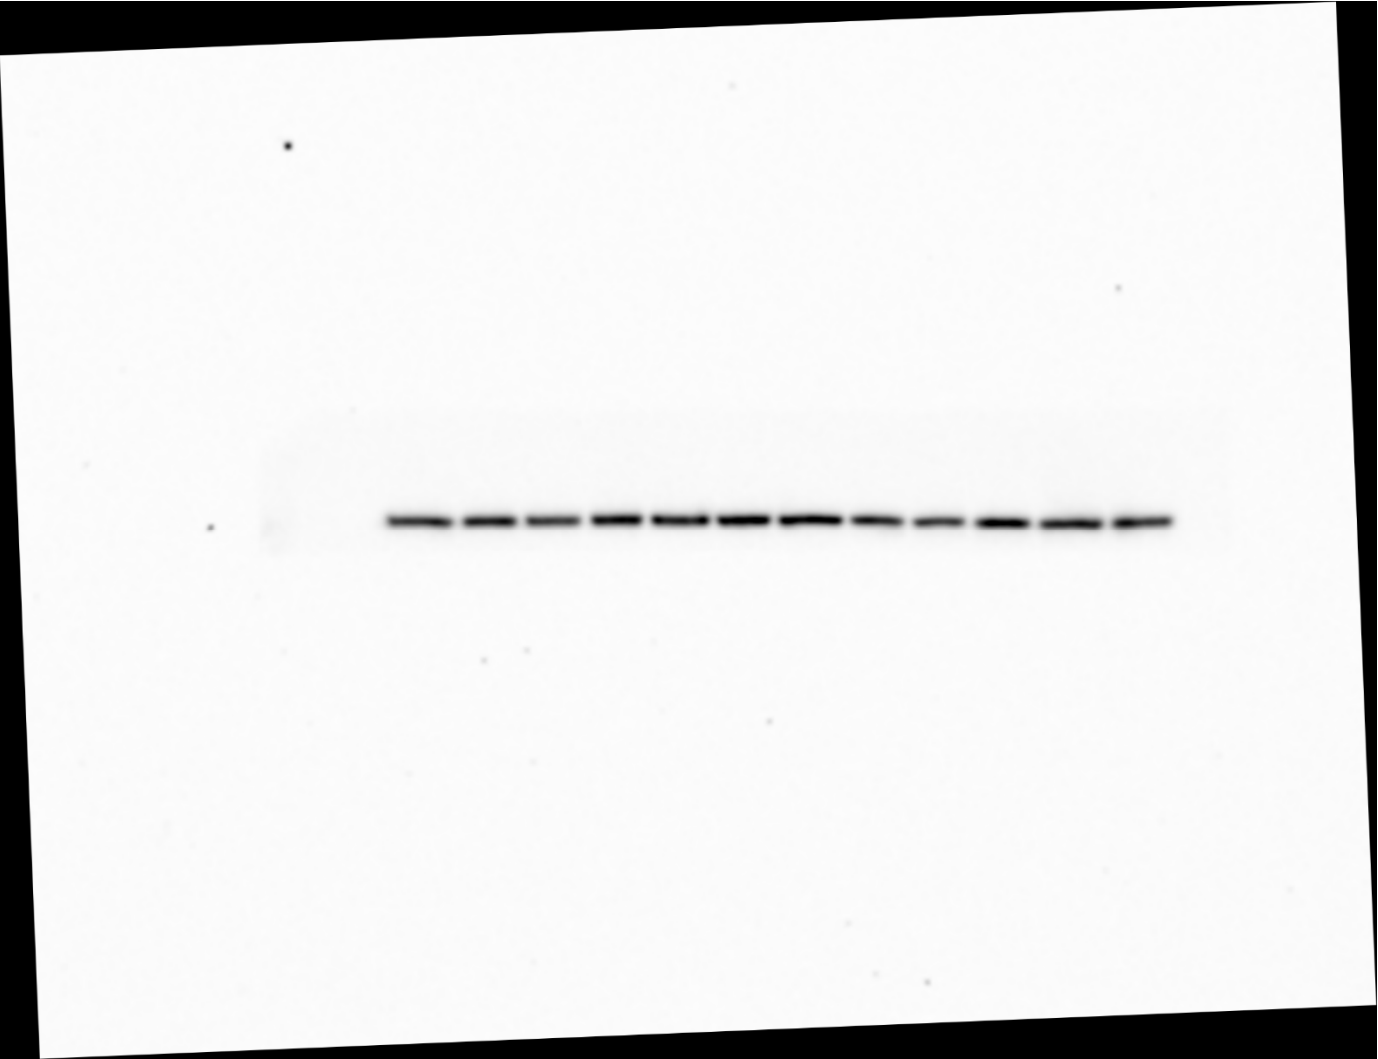

Fig. 6f. Immunoblotting for HK-2:  $\beta$ -actin reference.

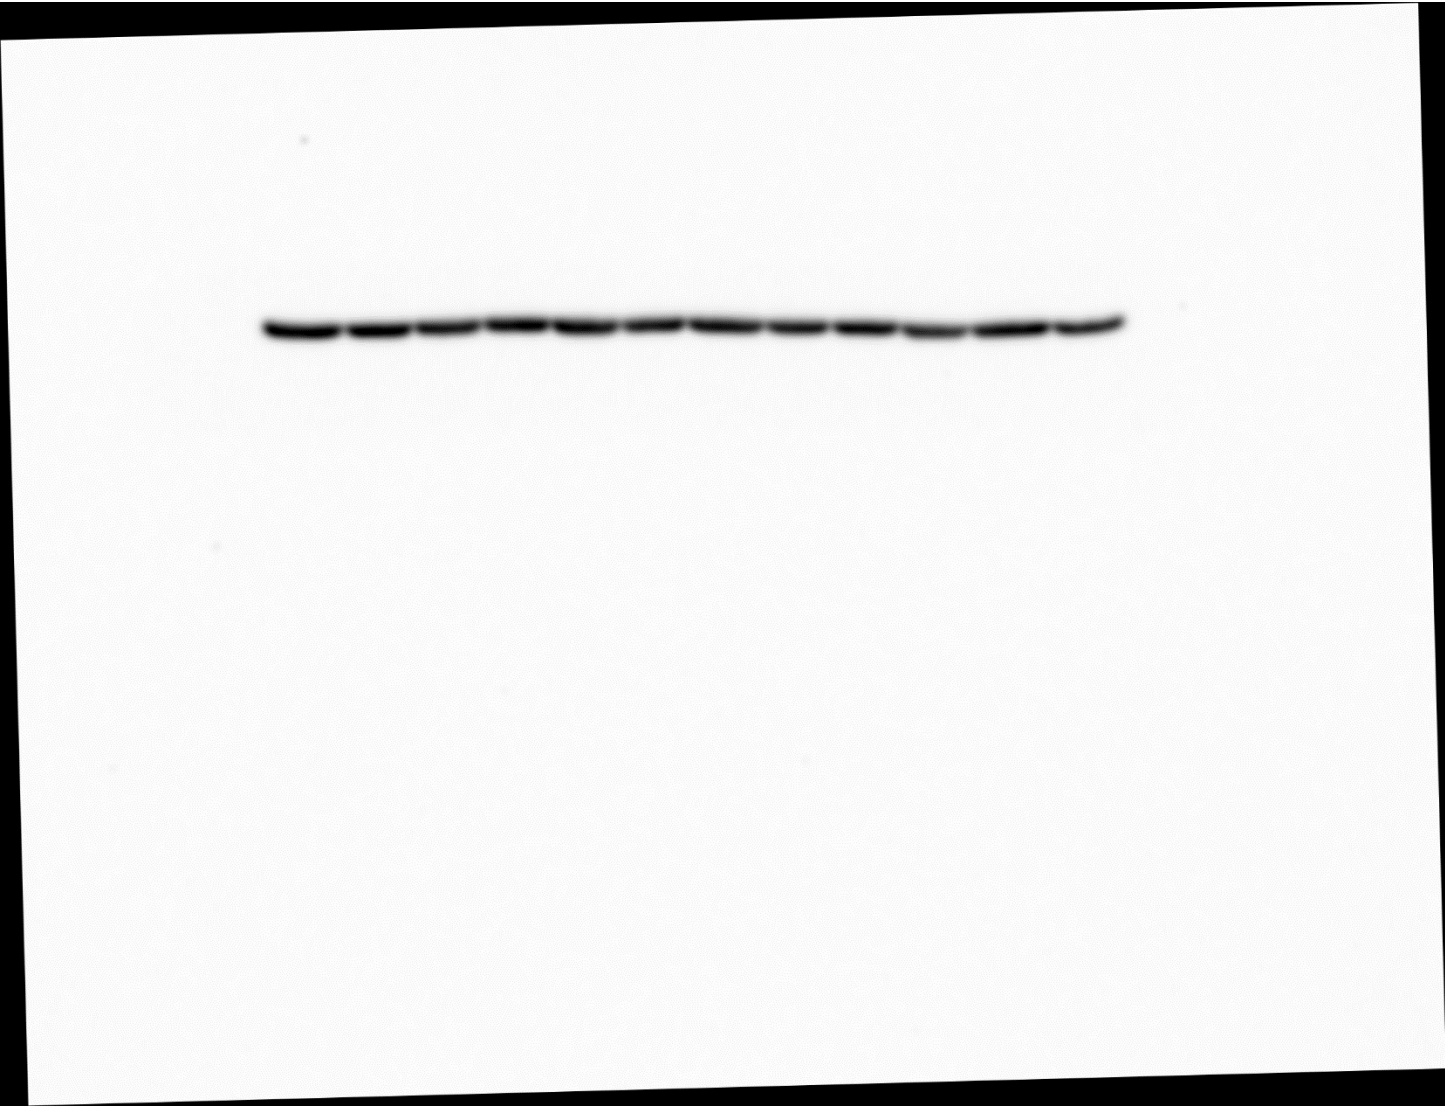

Supplement: 41598_2019_44358_MOESM1_ESM.pdf [file 41598_2019_44358_MOESM1_ESM.pdf]
